# 1 **Macrophage and dendritic cell subset composition can** 2 **distinguish endotypes in adjuvant-induced asthma** 3 **mouse models**

4

5 Müge Özkan<sup>1</sup>, Yusuf Cem Eskiocak<sup>2</sup>, Gerhard Wingender<sup>2,3\*</sup>

6 <sup>1</sup> Department of Genome Sciences and Molecular Biotechnology, Izmir International  
7 Biomedicine and Genome Institute, Dokuz Eylul University, 35340 Balçova/Izmir,  
8 Turkey;

9 <sup>2</sup> Izmir Biomedicine and Genome Center (IBG), 35340 Balçova/Izmir, Turkey.

10 <sup>3</sup> Department of Biomedicine and Health Technologies, Izmir International Biomedicine  
11 and Genome Institute, Dokuz Eylul University, 35340 Balçova/Izmir, Turkey.

12 \* Correspondence: [gerhard.wingender@ibg.edu.tr](mailto:gerhard.wingender@ibg.edu.tr) (G.W.)

13

## 14 **Keywords:**

15 Asthma, endotypes, pDC, interstitial macrophages, exudate macrophages

16

## 17 **Abbreviations:**

18 AM: alveolar macrophage; BALF: bronchoalveolar lavage fluid; CFA: complete Freud's  
19 adjuvant; COPD: chronic obstructive pulmonary disease; DC: dendritic cell; ExM: exudate  
20 macrophage; H&E: hematoxylin-eosin; HDM: house dust mite; iBALT: inducible  
21 bronchus-associated lymphoid tissue; IM: interstitial macrophage; mDC: myeloid  
22 dendritic cell; OVA: ovalbumin; PAS: periodic acid-Schiff stain; pDC: plasmacytoid  
23 dendritic cell.

24

## 25 **Abstract**

26 Asthma is a heterogeneous disease with neutrophilic and eosinophilic asthma as the main  
27 endotypes that are distinguished according to the cells recruited to the airways and the  
28 related pathology. Eosinophilic asthma is the treatment-responsive endotype, which is  
29 mainly associated with allergic asthma. Neutrophilic asthma is a treatment-resistant  
30 endotype, affecting 5-10% of asthmatics. Although eosinophilic asthma is well-studied, a  
31 clear understanding of the endotypes is essential to devise effective diagnosis and  
32 treatment approaches for neutrophilic asthma. To this end, we directly compared  
33 adjuvant-induced mouse models of neutrophilic (CFA/OVA) and eosinophilic (Alum/OVA)  
34 asthma side-by-side. The immune response in the inflamed lung was analyzed by multi-  
35 parametric flow cytometry and immunofluorescence. We found that eosinophilic asthma  
36 was characterized by a preferential recruitment of interstitial macrophages and myeloid  
37 dendritic cells, whereas in neutrophilic asthma plasmacytoid dendritic cells, exudate  
38 macrophages, and GL7<sup>+</sup> activated B cells predominated. This differential distribution of  
39 macrophage and dendritic cell subsets reveals important aspects of the pathophysiology  
40 of asthma and holds the promise to be used as biomarkers to diagnose asthma  
41 endotypes.

42

## 43 Introduction

44 Asthma is a chronic airway inflammation with often debilitating impacts on the health of  
45 patients. Based on the immune cells that infiltrate into the lung, several subtypes or  
46 endotypes for asthma have been described [1–3]. Type 2-high or eosinophilic asthma is  
47 the best-understood endotype and is often triggered by inhaled antigens, like house dust  
48 mites (HDM), ragweed pollen, mold, or cockroach proteins [1,4]. This eosinophilic asthma  
49 is characterized by (i) elevated levels of eosinophils (eosinophilia) and mast cells in the  
50 bronchia, by (ii) a type 2-polarized immune response, with the production of Th2  
51 cytokines, like IL-4, IL-5, and IL-13, and augmented production of antigen-specific IgE  
52 antibodies [1,5,6]. About half of all asthma patients have such an eosinophilic airway  
53 inflammation [1,7] and corticosteroids, anti-IgE, anti-IL-5/IL-5R, and anti-IL-4/IL-13  
54 treatment are effective at alleviating the symptoms [1,8,9]. However, such treatment is  
55 less effective in patients with a type 2-low, neutrophil-dominated form of asthma [10,11].  
56 This neutrophilic asthma is characterized, besides the neutrophilia, by an elevated Th1/17  
57 immune response, indicated by the cytokines IFN $\gamma$  and IL-17 [1,12–16]. Although  
58 treatments of type-2 low asthma by blocking IL-17, IL1 $\beta$ , or CXCR2 are in clinical trials,  
59 reports show that only a portion of the patients benefitted, suggesting the etiology of  
60 neutrophilic asthma is more complex [17].

61 Several *in vivo* mouse models were developed to study the pathogenic mechanisms  
62 underlying the endotypes and to develop endotype-specific treatment strategies. These  
63 mouse models differ in the means by which lung inflammation is induced. Asthma-like  
64 eosinophilic airway inflammation can be modeled by adjuvant-driven immunization  
65 [15,18–21], chronic antigen administration [19,22], and transfer of antigen-pulsed cells  
66 [18,19,23]. Asthma-like neutrophilic airway inflammation can be induced in mice by  
67 subcutaneous administration of either CFA [21,24], LPS [14,25], or poly(I:C) [26], along  
68 with a model antigen, like ovalbumin (OVA). For severe non-type 2 asthma, there is still  
69 a significant gap between disease-associated pathological features and a particular  
70 clinical outcome or treatment strategies. Hence, further research into immunological  
71 features and molecular mechanisms is required to develop new endotype-specific asthma  
72 treatments.

73 To determine additional immunophenotypic features specific for asthma-like neutrophilic  
74 airway inflammation, we adopted here mouse models that allowed for a direct side-by-  
75 side comparison of asthma-like eosinophilic and neutrophilic lung inflammation  
76 [15,20,21]. Specifically, we compared CFA/OVA-induced neutrophilic and Alum/OVA-  
77 induced eosinophilic asthma endotypes in mice [15,20,21] and provide an in-depth  
78 immunological analysis of the inflamed lung. Our data show that the two asthma  
79 endotypes demonstrate a significantly different distribution of macrophage and dendritic  
80 cell subsets.

81

## 82 Results

### 83 Adjuvant-induced mouse models of asthma endotypes

84 To study the immune response in the inflamed lung during eosinophilic and neutrophilic  
85 asthma side-by-side, we adopted two adjuvant-induced mouse models [15,21] (**Fig 1A**).  
86 We first confirmed that the models faithfully reflect the eosinophilic and neutrophilic  
87 asthma endotypes. As expected, the cell analysis from BALF and lung showed high levels  
88 of eosinophils (**Fig 1B**) or neutrophils (**Fig 1C**) in the eosinophilic (Alum/OVA) or  
89 neutrophilic (CFA/OVA) asthma groups, respectively. In both cases, the data from the  
90 BALF mirrored the data obtained from the lung (**Fig 1B, C**). Immunohistochemical  
91 staining of the inflamed lungs showed severe inflammation with bleeding in the  
92 neutrophilic (CFA/OVA) group (**Fig 1D**, upper panel). However, the hyper-mucus  
93 secretion, which is an important driver of the airway obstruction in asthma [1], was  
94 comparable for both endotypes (**Fig 1D**, lower panel). Furthermore, in line with the  
95 literature [27,28], the Th2 cytokines IL-5 and IL-13 were prevalent in eosinophilic asthma,  
96 whereas the Th1 cytokine IFN $\gamma$  predominated in neutrophilic asthma (**Fig 1E**). Next, the  
97 antigen-specific humoral immune response was quantified. For serum IgE, higher levels  
98 were reported in eosinophilic asthma patients than in neutrophilic asthma patients [29,30],  
99 and  $\alpha$ IgE therapy was effective for eosinophilic asthma [29,31]. However, in our mouse  
100 models, the OVA-specific serum IgE antibody levels were comparable in the eosinophilic  
101 (Alum/OVA) and neutrophilic (CFA/OVA) asthma groups (**Fig 1F**). Furthermore, and in  
102 line with clinical data [32,33], the antigen-specific serum IgG and IgG1 antibody levels  
103 were significantly higher in the eosinophilic than the neutrophilic asthma endotype (**Fig**  
104 **1F**). No difference was observed for OVA-specific IgG2b and IgG2c antibody levels (**Fig**  
105 **1F**). These data demonstrate that the mouse models used here successfully replicate key  
106 features of human eosinophilic and neutrophilic asthma and are suitable to investigate  
107 asthma endotypes.

108

109 **Fig 1: Neutrophilic and eosinophilic asthma can successfully be modeled in**  
110 **mice. (A)** Experimental design and immunization timeline. C57BL/6 mice (naïve

111 group n = 9 mice/group, experimental asthma groups n = 14-15 mice/group) were  
112 either immunized three times intraperitoneal (i.p.) with Alum (1 mg/mouse) for  
113 eosinophilic asthma or once subcutaneous (s.c.) with CFA (0.5 mg/mL) for  
114 neutrophilic asthma along with the model antigen OVA (20 µg/mouse). Three  
115 weeks after the first administration, the experimental groups were challenged with  
116 OVA (50 µg/mouse) daily for two days. Samples were collected 16-18 hours post-  
117 challenge. Cells from bronchoalveolar lavage fluid (BALF) and lung homogenates  
118 were stained for **(B)** eosinophils (live CD45<sup>+</sup> CD19<sup>-</sup> CD11c<sup>-</sup> CD11b<sup>-</sup> Ly6G<sup>-</sup> Siglec-  
119 F<sup>+</sup>) and **(C)** neutrophils (live CD45<sup>+</sup> CD19<sup>-</sup> CD11b<sup>+/lo</sup> Ly6G<sup>+</sup>). **(D)** H&E (upper panel)  
120 and Alcian Blue/PAS (lower panel) immunohistochemistry analysis of inflamed  
121 lungs collected from indicated groups (10X magnification, scale 127 µm). **(E)**  
122 ELISA values of IFN $\gamma$ , IL-5, and IL-13 from indicated BALF supernatants. **(F)** OVA-  
123 specific IgE, total IgG, IgG1, IgG2b, and IgG2c ELISA results in serum indicated  
124 groups (for OVA-specific antibody ELISA results, naïve group n = 3 mice/group,  
125 experimental asthma groups n = 14-15 mice/group). Combined data from three  
126 independent experiments are shown. The gating strategy for the myeloid cells is  
127 detailed in the S1 figure.

128

## 129 **Neutrophilic asthma is characterized by high numbers of** 130 **plasmacytoid dendritic cells in the BALF**

131 We next optimized a 19-parameter flow cytometry panel to quantify myeloid cells in  
132 addition to eosinophils and neutrophils, including basophils, mast cells, monocytes, as  
133 well as dendritic cells, and macrophage subsets in the bronchoalveolar lavage fluid  
134 (BALF) and lung samples (S1 Fig). A more robust influx of leukocytes into the BALF was  
135 observed following neutrophilic (CFA/OVA) than eosinophilic (Alum/OVA) asthma, with  
136 up to 4 x 10<sup>5</sup> total cells/mL (**Fig 2A**). The myeloid cell populations recovered from BALF,  
137 sorted from the highest to the lowest frequency, were neutrophils/eosinophils (**Fig 1B**,  
138 **1C**), monocytes, macrophages, dendritic cells (DCs) (**Fig 2A**), and few basophils (**Fig**  
139 **2B**) and mast cells (**Fig 2C**). In contrast to the BALF, basophils (**Fig 2B**), and mast cells  
140 (**Fig 2C**) were found to be enriched in the lung tissue of mice with eosinophilic (Alum/OVA)

141 asthma. These data indicate that basophils and mast cells do not migrate to the BALF  
142 during lung inflammation. Although DCs constituted less than 1% of the BALF cells (**Fig**  
143 **2A**), they were previously associated with the induction of Th2 immune responses in  
144 patients with allergic asthma [34]. To better understand the movement of DCs and their  
145 role in eosinophilic vs. neutrophilic asthma, we determined the frequency of DC subsets  
146 in the inflamed lung as CD11b<sup>+</sup> conventional (myeloid) DC (cDCs), CD103<sup>+</sup> lung resident  
147 DCs, and CD45R<sup>+</sup> plasmacytoid dendritic cells (pDCs). Both CD11b<sup>+</sup> cDC (**Fig 2D**) and  
148 lung resident CD103<sup>+</sup> DCs (**Fig 2E**) were more frequent in the lung tissue of mice with  
149 eosinophilic (Alum/OVA) than neutrophilic (CFA/OVA) asthma. In contrast, the frequency  
150 of pDCs did not change in the lung during the inflammation (**Fig 2F**). However, pDCs  
151 appeared to be the only DC population to migrate to the alveolar space, which was more  
152 prominent during neutrophilic (CFA/OVA) than eosinophilic (Alum/OVA) asthma (**Fig 2F**).

153

154 **Fig 2: DC subsets, mast cells, and basophils are differentially recruited to**  
155 **the inflamed lungs in neutrophilic and eosinophilic asthma.** C57BL/6 mice  
156 (naïve group n = 12 mice/group, experimental asthma groups n = 17-18  
157 mice/group) were immunized as outlined in figure 1A to induce neutrophilic  
158 (CFA/OVA) or eosinophilic (Alum/OVA) asthma. Cells from bronchoalveolar  
159 lavage fluid (BALF) and lung homogenates were analyzed for indicated cell  
160 populations. **(A)** Total cell counts of all leukocytes (live CD45<sup>+</sup> cells), macrophages  
161 (live CD19<sup>-</sup> CD45<sup>+</sup> Siglec-F<sup>-</sup> Ly6G<sup>-</sup> F4/80<sup>+</sup> CD64<sup>+</sup>), dendritic cells (live CD19<sup>-</sup> CD45<sup>+</sup>  
162 Siglec-F<sup>-</sup> Ly6G<sup>-</sup> F4/80<sup>-</sup> CD64<sup>-</sup> CD24<sup>+</sup> CD11c<sup>+</sup> MHC class II<sup>+/+</sup>), and monocytes (live  
163 CD19<sup>-</sup> CD45<sup>+</sup> Siglec-F<sup>-</sup> Ly6G<sup>-</sup> F4/80<sup>-</sup> CD64<sup>-</sup> CD24<sup>-</sup> CD11c<sup>-</sup> MHC class II<sup>+/+</sup> Ly6C<sup>+</sup>) in  
164 the BALF. Total cell counts and relative cell frequencies of **(B)** basophils (live  
165 CD45<sup>+</sup> CD19<sup>-</sup> Siglec-F<sup>-</sup> Ly6G<sup>-</sup> CD11b<sup>+</sup> FcεR1α<sup>+</sup> CD117<sup>-</sup> cells); **(C)** mast cells (live  
166 CD45<sup>+</sup> CD19<sup>-</sup> Siglec-F<sup>-</sup> Ly6G<sup>-</sup> CD11b<sup>+</sup> FcεR1α<sup>+</sup> CD117<sup>+</sup> cells); **(D)** conventional  
167 DCs (cDC, live CD45<sup>+</sup> CD19<sup>-</sup> Siglec-F<sup>-</sup> Ly6G<sup>-</sup> CD24<sup>+</sup> CD11c<sup>+</sup> MHC class II<sup>+</sup> CD103<sup>-</sup>  
168 CD11b<sup>+</sup> cells); **(E)** CD103<sup>+</sup> DCs (live CD45<sup>+</sup> CD19<sup>-</sup> Siglec-F<sup>-</sup> Ly6G<sup>-</sup> CD24<sup>+</sup> CD11c<sup>+</sup>  
169 MHC class II<sup>+</sup> CD103<sup>+</sup> cells); and **(F)** plasmacytoid dendritic cells (pDC, live CD19<sup>-</sup>  
170 CD45<sup>+</sup> Siglec-F<sup>-</sup> Ly6G<sup>-</sup> CD11b<sup>-</sup> CD45R<sup>+</sup> Ly6C<sup>+</sup>) in indicated organs. Combined data  
171 from four (A, D-F) or three (B, C) independent experiments are shown.

172

173 **The frequency of exudate and interstitial macrophages markedly**  
174 **differs between asthma endotypes**

175 In the steady-state, pulmonary macrophages consist mainly of two subsets, alveolar  
176 macrophages (AMs) and interstitial macrophages (IMs) [35]. AMs, which represent the  
177 major portion of lung resident macrophages, are tissue-resident macrophages of  
178 embryonic origin that self-renew in the lung [36,37]. In contrast, IMs are derived from  
179 blood monocytes that infiltrated into the lung parenchyma [37,38]. During lung  
180 inflammations, another blood monocyte-derived macrophage population that can be  
181 found in the lung are the non-resident Ly6C<sup>hi</sup> or exudate macrophages (ExMs) [39–42].  
182 To characterize the turnover of macrophages in the two asthma endotypes, the frequency  
183 of AMs, IMs, and ExMs was determined in the BALF and lungs. In line with the large  
184 increase of macrophages in the lung (Figure 2A), the frequency of AMs considerably  
185 declined in the BALF and the lung of both asthma groups compared to the control group  
186 (**Fig 3A**). As IMs are located mainly in the lung parenchyma [37], it was expected that  
187 their numbers did not greatly increase in the BALF, leading to a sharp decline in their  
188 relative frequency in the BALF (**Fig 3B**). Interestingly, however, an increase in the  
189 frequency of IMs in the lung was only observed in the mice with eosinophilic (Alum/OVA)  
190 and not neutrophilic (CFA/OVA) asthma (**Fig 3B**). In contrast, the influx of ExMs was  
191 more prominent in the neutrophilic (CFA/OVA) than the eosinophilic (Alum/OVA) asthma  
192 group, which was particularly striking in the BALF (**Fig 3C**). Recently, it was suggested  
193 that the IMs themselves can be divided into three subsets, based on the expression of  
194 CD11b, CD11c, and MHC class II [38]. When these subsets were analyzed (**Fig 3D-F**),  
195 we noticed that the IM population in the eosinophilic (Alum/OVA) inflammation mainly  
196 consisted of the CD11c<sup>+</sup> MHC class II<sup>neg</sup> population (**Fig 3E, F**), which was described to  
197 have the highest phagocytic activity and the lowest turnover rate among the IM subsets  
198 [38]. Together, these data indicate that eosinophilic and neutrophilic asthma involve  
199 significantly different macrophage populations, with IMs increasing in the lungs with  
200 eosinophilic asthma and ExMs increasing in neutrophilic asthma.

201



202 **Fig 3: The distribution of lung macrophage subsets among asthma**  
203 **endotypes.** C57BL/6 mice (naïve group n = 12 mice/group, experimental asthma  
204 groups n = 17-18 mice/group) were immunized as outlined in figure 1A to induce  
205 neutrophilic (CFA/OVA) or eosinophilic (Alum/OVA) asthma. Cells from  
206 bronchoalveolar lavage fluid (BALF) and lung homogenates were analyzed for  
207 indicated cell populations: **(A)** alveolar macrophages (AMs, live CD45<sup>+</sup> CD19<sup>-</sup>  
208 Siglec-F<sup>-</sup> Ly6G<sup>-</sup> CD11c<sup>+</sup> cells), **(B)** interstitial macrophages (IMs, live CD45<sup>+</sup> CD19<sup>-</sup>  
209 Siglec-F<sup>-</sup> Ly6G<sup>-</sup> CD24<sup>-</sup> F4/80<sup>+</sup> CD64<sup>+/-</sup> Ly6C<sup>-</sup> CD11b<sup>+</sup> cells); and **(C)** exudate  
210 macrophages (ExMs, live CD45<sup>+</sup> CD19<sup>-</sup> Siglec-F<sup>-</sup> Ly6G<sup>-</sup> CD24<sup>-</sup> F4/80<sup>+</sup> CD64<sup>+/-</sup>  
211 Ly6C<sup>+</sup> CD11b<sup>+</sup> cells). **(D)** Representative dot plots showing IMs (Ly6C<sup>-</sup> CD11b<sup>+</sup>  
212 cells) and ExMs (Ly6C<sup>+</sup> CD11b<sup>+</sup> cells) in BALF (upper panel) and lung (lower  
213 panel) from indicated groups. **(E)** Representative histograms showing the  
214 expression of MHC class II, CD11b, and CD11c on bronchial IMs from indicated  
215 groups. **(F)** Bronchial IMs (BIMs) were subdivided according to their expression of  
216 CD11c and MHC class II and the frequencies of BIM1 (CD11c<sup>+</sup> MHC class II<sup>+</sup>, left  
217 panel), BIM2 (CD11c<sup>-</sup> MHC class II<sup>+</sup>, middle panel), and BIM3 (CD11c<sup>+</sup> MHC class  
218 II<sup>neg</sup>, right panel) cells are shown. Combined data from four independent  
219 experiments are shown.

220

## 221 **Th17 cells, but not NKT17 cells, are significantly expanded in** 222 **neutrophilic asthma**

223 Both conventional CD4<sup>+</sup> T cells [43,44] and innate-like invariant Natural Killer (*i*NKT) cells  
224 [45–48] have been shown to be involved in asthma in humans and mouse models.  
225 Therefore, we next measured the subset distributions of CD4<sup>+</sup> T cells (Th1, Th2, Th17,  
226 Treg) and *i*NKT cells (NKT1, NKT2, NKT17) in our eosinophilic and neutrophilic asthma  
227 model. Surprisingly, for the frequency of Th1 and Th2 cells and of Tregs, no significant  
228 difference was observed in the lungs of mice with eosinophilic (Alum/OVA) or neutrophilic  
229 (CFA/OVA) asthma (**Fig 4A**). Similarly, the production of the cytokines IFN $\gamma$ , IL-4, IL-13,  
230 and TNF by CD4<sup>+</sup> T cells did not differ between the eosinophilic (Alum/OVA) and  
231 neutrophilic (CFA/OVA) asthma groups (**Fig 4B**). In contrast, the frequency of Th17 cells

232 in the lung (**Fig 4A**), as well as the production of IL-17 by CD4<sup>+</sup> T cells (**Fig 4B**), was  
233 significantly higher in the lungs of mice with neutrophilic (CFA/OVA) than with eosinophilic  
234 (Alum/OVA) asthma. The lung *i*NKT cells (**Fig 4C**) were mainly NKT1 cells (**Fig 4D**) and  
235 their frequency increased during neutrophilic (CFA/OVA) asthma (**Fig 4D**). No changes  
236 were observed in the lungs for NKT2 cells (**Fig 4D**). However, the frequency of NKT17  
237 cells decreased during neutrophilic (CFA/OVA) asthma (**Fig 4D**), which was, interestingly,  
238 the opposite of the changes observed for Th17 cells (**Fig 4A**).

239

240 **Fig 4: Frequency of CD4<sup>+</sup> T and *i*NKT cell subsets in the inflamed lungs**  
241 **during neutrophilic and eosinophilic asthma.** C57BL/6 mice (naïve group n =  
242 12 mice/group, experimental asthma groups n = 17-18 mice/group) were  
243 immunized as outlined in figure 1A to induce neutrophilic (CFA/OVA) or  
244 eosinophilic (Alum/OVA) asthma. Cells from lung homogenates were stained for  
245 indicated cell populations. **(A)** The relative cell frequency of lung Th1 cells (live  
246 CD19<sup>-</sup> CD3 $\epsilon$ <sup>+</sup> CD4<sup>+</sup> FoxP3<sup>-</sup> Tbet<sup>+</sup> cells), Th2 cells (live CD19<sup>-</sup> CD3 $\epsilon$ <sup>+</sup> CD4<sup>+</sup> FoxP3<sup>-</sup>  
247 Gata3<sup>+</sup> cells), Th17 cells (live CD19<sup>-</sup> CD3 $\epsilon$ <sup>+</sup> CD4<sup>+</sup> FoxP3<sup>-</sup> ROR $\gamma$ t<sup>+</sup> cells), and Tregs  
248 (live CD19<sup>-</sup> CD3 $\epsilon$ <sup>+</sup> CD4<sup>+</sup> CD127<sup>lo/-</sup> FoxP3<sup>+</sup> cells) is shown. **(B)** Production of the  
249 indicated cytokines by lung CD4<sup>+</sup> T cells following *in vitro* stimulation with PMA and  
250 ionomycin. **(C)** Gating for *i*NKT cell (live CD19<sup>-</sup> CD3 $\epsilon$ <sup>+</sup> CD1d/PBS57-tetramer<sup>+</sup>  
251 cells) subsets in the lung (NKT1 cells: PLZF<sup>lo</sup> ROR $\gamma$ t<sup>+</sup> cells, NKT2 cells: PLZF<sup>int/hi</sup>  
252 ROR $\gamma$ t<sup>+</sup> cells, NKT17 cells: PLZF<sup>int</sup> ROR $\gamma$ t<sup>+</sup> cells). **(D)** Relative frequency of NKT1  
253 and NKT17 cells in the lung of indicated mice. Combined data from three (C, D),  
254 four (A), or two (B) independent experiments are shown. The gating strategy for  
255 the lymphoid cells is detailed in the S2 figure.

256

## 257 **Neutrophilic asthma is characterized by an increase of** 258 **activated B cell numbers**

259 B cells, besides their ability to produce allergen-specific antibodies [49], are involved in  
260 the pathogenesis of chronic lung inflammation either by presenting antigens to T cells

261 [50] or by the formation of ‘inducible bronchus-associated lymphoid tissue’ (iBALTs) [51].  
262 iBALTs are tertiary lymphoid structures that are rapidly induced and provide an effective  
263 local site to drive lymphocyte activation and immune response in the lung [52]. To assess  
264 the B cell responses during eosinophilic (Alum/OVA) and neutrophilic (CFA/OVA) asthma,  
265 we measured the frequency of B cells and their cytokine production, as well as the  
266 frequency of germinal center (GC) B cells in the lungs. Although the overall frequency of  
267 B cell was comparable between the BALFs and lungs with eosinophilic (Alum/OVA) or  
268 neutrophilic (CFA/OVA) asthma (**Fig 5A**), the IFN $\gamma$  production of B cells from lungs with  
269 neutrophilic asthma was significantly higher than in the neutrophilic asthma group (**Fig**  
270 **5B**). No difference was observed for IL-4, IL-17, and TNF production by the B cells (**Fig**  
271 **5B**). Importantly, we noticed a significant increase of CD45R/B220<sup>+</sup> GL7<sup>+</sup> CD95<sup>+</sup> germinal  
272 center (GC) B cells in the lungs of mice with neutrophilic (CFA/OVA) asthma, which was  
273 not observed in the lungs from mice with eosinophilic (Alum/OVA) asthma (**Fig 5C**).  
274 These data indicate that iBALT formation was only supported during neutrophilic asthma  
275 in our mouse models, a finding that was supported by the immunofluorescence of the  
276 inflamed lungs (**Fig 5D**).

277

278 **Fig 5: iBALT formation is more pronounced in neutrophilic than in**  
279 **eosinophilic asthma.** C57BL/6 mice (naïve group n = 5 mice/group, experimental  
280 asthma groups n = 8-9 mice/group) were immunized as outlined in figure 1A to  
281 induce neutrophilic (CFA/OVA) or eosinophilic (Alum/OVA) asthma. Cells from  
282 bronchoalveolar lavage fluid (BALF) and lung homogenates were analyzed for  
283 indicated cell populations. **(A)** Total cell count (left panel) and relative cell  
284 frequencies of B cells (live CD45<sup>+</sup>) in indicated organs. **(B)** Production of the  
285 indicated cytokines by lung B cells (live CD45<sup>+</sup>) following *in vitro* stimulation with  
286 PMA and ionomycin. The values are given as fold-change of the two experimental  
287 groups over the control group. **(C)** Relative cell frequencies of germinal center  
288 (GC) B cells (live CD3 $\epsilon$ <sup>-</sup> CD45R<sup>+</sup> CD95<sup>+</sup> GL7<sup>+</sup> cells) in lung homogenates. **(D)**  
289 Inflamed lungs were fixed with 4% PFA (4h, 4°C), prepared for cryostat sectioning  
290 (7-10  $\mu$ m), and stained with DAPI (white), CD45R-AF647 (blue), GL7-AF488

291 (green), and TCR $\beta$ -AF594 (red). Scale = 50  $\mu$ m. Representative data from three  
292 biological replicates are shown. Unless indicated otherwise, combined data from  
293 two independent experiments are shown.

294

## 295 Discussion

296 Neutrophilic asthma responds poorly to the main treatment options currently available for  
297 asthma patients, severely impacting the quality of life of patients. A better understanding  
298 of the immunological features and underlying immunopathology of the different asthma  
299 endotypes is expected to lead the way to improved therapies. Here, we directly compared  
300 in detail the immune response (i) between asthma-like neutrophilic airway inflammation  
301 in mouse models and (ii) between BALF vs. lung tissue of those mice. Our data  
302 demonstrate that the BALF provides a good immunological representation of the inflamed  
303 lung. Furthermore, asthma endotypes are characterized by the distinct distribution of  
304 several myeloid cells, besides eosinophils and neutrophils; namely cDCs, CD103<sup>+</sup> DCs,  
305 pDCs, interstitial macrophages (IMs), and exudate macrophages (ExMs). For these  
306 populations, several differences between BALF and lung tissue were noted, which  
307 indicates that pDCs and ExMs in BALF can identify neutrophilic asthma in mice.  
308 Furthermore, Th17 cells, but not NKT17 cells or germinal center B cells, were significantly  
309 expanded in neutrophilic asthma.

310 Asthma is a heterogeneous disease and new endotypes are being described in the clinic.  
311 However, many challenges remain. Airway inflammations, like asthma, have long been  
312 modeled *in vivo* in animals to gain insight into pathogenesis, progression, and treatment  
313 options. Despite their intrinsic limitations, such animal models are instrumental for our  
314 understanding of complex human diseases. Prime/boost immunization of mice with  
315 ovalbumin (OVA) together with the adjuvant Alum (aluminum hydroxide) is a well-  
316 described approach to induce a type-2 immune response in the airways, including  
317 antigen-specific IgEs, hypersensitivity responses, and airway remodeling [32]. Clinically  
318 relevant allergens, such as extracts of house dust mites (HDM), have also been used in  
319 animal models [53,54]. However, their use is hampered by technical difficulties and a lack  
320 of standardization, which reduces reproducibility [55]. For neutrophilic asthma, less work  
321 and fewer animal models have been reported [56]. Based on literature data and our  
322 preliminary results, we concluded that the adjuvant-induced eosinophilic (Alum/OVA) and  
323 neutrophilic (CFA/OVA) asthma models used here are best suited to compare asthma-  
324 like eosinophilic and neutrophilic lung inflammation side-by-side.

325 Basophils [57,58] and mast cells [59,60] are associated with allergen-induced airway  
326 inflammation due to IgE-mediated effector functions. In line with these reports, we noted  
327 a clear increase in basophils (Fig 2B) and mast cells (Fig 2C) in the lungs of mice with  
328 eosinophilic airway inflammation (Alum/OVA). Furthermore, our data indicate that  
329 basophils and mast cells do not migrate to the BALF during allergen-induced lung  
330 inflammation. To our knowledge, this is the first report showing this directly for  
331 eosinophilic and neutrophilic asthma. In Th2-low (neutrophilic) asthma, mast cells locate  
332 to the proximal airway epithelium [61,62] and the submucosal region [63], whereas in  
333 Th2-high (eosinophilic) asthma, they are found in the intraepithelial region [61,62].  
334 Therefore, it seems possible that the location of the mast cells, and potentially the  
335 basophils, in the inflamed lung limits their propensity to migrate to the BALF.

336 In allergic, eosinophilic airway inflammation, the antigen presentation by pulmonary  
337 CD11b<sup>+</sup> cDCs and CD103<sup>+</sup> cDCs is essential for the induction of the Th2 response [64].  
338 Although pDCs have the ability, similar to other pulmonary DCs, to take up and process  
339 antigens [65], they actually prevent the differentiation of effector T cells, and depletion of  
340 pDCs could exacerbate lung inflammation in an LPS-induced asthma model [66,67]. In  
341 addition, pDCs are associated with the induction of type 1 immune responses and, for  
342 example, protect from viral bronchiolitis [68] and suppress ILC2 activity via IFN $\alpha$  during  
343 fungus-induced allergic asthma [69]. Similar to the literature, we found that conventional  
344 pulmonary DCs, including CD11b<sup>+</sup> and CD103<sup>+</sup> cDCs, are significantly expanded in  
345 eosinophilic asthma (Fig 2D, 2E). In contrast, in neutrophilic asthma, pDCs were the only  
346 DCs that infiltrated the alveolar space of the inflamed lung (Fig 2F). Although pDCs have  
347 been reported to increase upon allergen challenge in the BALF [70] and the induced  
348 sputum [71] of asthmatic patients, to our knowledge, no study compared their frequency  
349 in different endotypes. Interestingly, the increase of pDCs in the BALF was not  
350 accompanied by an increase of pDCs in the lung itself (Fig 2F).

351 Macrophages are important innate immune cells involved in tissue homeostasis and host  
352 defense. Lung macrophage subsets were initially defined by their location: alveolar  
353 macrophages (AMs) are mainly found in the alveolar lumen, whereas interstitial  
354 macrophages (IMs) reside in the lung interstitium [35,72]. AMs are essential for the repair  
355 of lung injuries induced, e.g. by physical damage [73], LPS [74,75], or infections [39].

356 Consequently, AMs are also protective during allergic airway inflammation [76] and lung  
357 fibrosis [77]. In contrast, IMs, which constitute approx. 9% of the macrophages in a  
358 healthy lung [38], have primarily proinflammatory functions. For example, they aggravate  
359 allergic inflammation [78] and fibrosis [79]. During lung inflammations, blood-monocytes  
360 can infiltrate the lung and give rise to a third lung macrophage population, Ly6C<sup>hi</sup> exudate  
361 macrophages (ExMs). ExMs are mainly proinflammatory and have been described, for  
362 example, during lung inflammations caused by diphtheria toxin [41] and infections with  
363 bacteria [39,42], fungi [40], or viruses [80]. Due to their functional differences, it is  
364 important to analyze macrophages on the subset level during pulmonary diseases. When  
365 we analyzed AMs, IMs, and ExMs from the BALF and the inflamed lung of mice with  
366 eosinophilic and neutrophilic asthma, several changes were apparent. In line with  
367 previous findings [81], AMs significantly declined during both types of lung inflammation  
368 (Fig 3A). Importantly, we found that the frequency of IMs and ExMs distinguishes the two  
369 asthma endotypes, with IMs being expanded more in eosinophilic asthma (Fig 3B) and  
370 ExMs being more prevalent in neutrophilic asthma (Fig 3C). Further analysis of the IMs  
371 based on surface markers [38], showed that the IMs in both endotypes mainly consisted  
372 of the CD11c<sup>lo</sup> MHC class II<sup>neg</sup> population (Fig 3E, F), which has high phagocytic activity  
373 [38]. It will be important to clarify if the differences in the distribution of macrophage  
374 populations can be used as biomarkers to stratify asthma patients.

375 Analyzing T cells, we noted the increase of Th17 cells and IL-17 production in neutrophilic  
376 asthma (Fig 4A, B), which is in line with previous reports [82]. In contrast to the Th17  
377 cells, however, the frequency of NKT17 cells was decreased in neutrophilic asthma (Fig  
378 4D), suggesting that *i*NKT cells might be less relevant for the pathology of this asthma  
379 endotype.

380 iBALTs (inducible bronchus-associated lymphoid tissues) are tertiary lymphoid tissue,  
381 structurally similar to germinal centers in the lymph nodes, which are formed in the  
382 airways during lung inflammation, for example, following infections or during chronic  
383 diseases, like COPD (chronic obstructive pulmonary disease) [52]. In allergic asthma  
384 models, iBALTs support the Th2 cell responses induced by fungal infection [83] or LPS  
385 [84]. Within iBALTs, germinal center (GC) B cells can act as APCs by presenting inhaled  
386 antigens to T cells and can drive their differentiation into Th2 cells [50]. Conversely,



387 antigen-specific Th2 cells can support iBALT formation [85]. However, the role of iBALT  
388 in neutrophilic asthma and how it would compare to eosinophilic asthma is not known.  
389 We provide here, to our knowledge, the first direct comparison of GC B cells and iBALTs  
390 in these two asthma endotypes. Histological examination did not indicate that the size of  
391 the iBALTs differed between the two endotypes (Fig 5D). However, we found that in  
392 neutrophilic but not eosinophilic asthma the frequency of GC B cells was greatly  
393 increased (Fig 5C) and that they produce more IFN $\gamma$  following activation (Fig 5B). These  
394 data suggest that activated B cells, locally in the inflamed lung, might contribute to the  
395 pathology in neutrophilic asthma.

396 Our side-by-side comparison of BALF and lung tissue also revealed several unexpected  
397 discrepancies. Although we observed clear differences between eosinophilic and  
398 neutrophilic asthma in the lungs for basophils, mast cells, cDCs, CD103<sup>+</sup> DCs (Fig 2B-E),  
399 as well as IMs (Fig 3B), these changes were not represented in the BALF. As BALF of  
400 asthma patients is easier accessible than lung tissue, it is important to know which cell  
401 populations in the BALF are most indicative for the lung inflammation. Our data indicate  
402 that both pDCs (Fig 2F) and ExMs (Fig 3C) were markedly increased in the BALF of mice  
403 with neutrophilic but not eosinophilic asthma, making them possible candidates for the  
404 clinical diagnosis of asthma endotypes.

405 In summary, we report here, to our knowledge for the first time, a direct side-by-side  
406 comparison of the main myeloid cell populations, *i*NKT cells, and GC B cells from the  
407 inflamed lungs of mice with adjuvant-induced eosinophilic and neutrophilic asthma. These  
408 data suggest that the subset distribution of macrophages and dendritic cells in the BALF  
409 could be used to aid the determination of asthma endotypes. Although further research  
410 is required to verify these results in asthma patients, the differential distribution of myeloid  
411 cells, other than eosinophils and neutrophils, promises to be helpful as an early biomarker  
412 to support the stratification of asthma endotypes.

413



## 414 **Material and Methods**

### 415 **Mice**

416 All mice were housed in the vivarium of the Izmir Biomedicine and Genome Center (IBG,  
417 Izmir, Turkey) in accordance with the respective institutional animal care committee  
418 guidelines. All mouse experiments were performed with prior approval by the institutional  
419 ethic committee ('Ethical Committee on Animal Experimentation'), in accordance with  
420 national laws and policies. All the methods were carried out in accordance with the  
421 approved guidelines and regulations.

422

### 423 **Reagents, monoclonal antibodies, and flow cytometry**

424 Monoclonal antibodies against the following mouse antigens were used in this study:  
425 CD3 $\epsilon$  (145.2C11, 17A2), CD4 (RM4-5), CD8 $\alpha$  (53-6.7, 5H10), CD11b (M1/70), CD11c  
426 (N418), CD19 (1D3, 6D5), CD24 (M1/69), CD44 (IM7), CD45 (30-F11), CD45.2 (104)  
427 CD45R/B220 (RA3-6B2), CD64 (X54-5/7.1), CD95 (SA367H8), CD103 (3E7),  
428 CD117/cKit (2B8), CD122 (TM-beta1), CD127 (A7R34, SB/199), CD170/Siglec F (E50-  
429 2440), F4/80 (BM8), Fc $\epsilon$ R1 $\alpha$  (MAR-1), FoxP3 (FJK-16s), Gata3 (L50-823), GL7 (GL7),  
430 IFN $\gamma$  (XMG1.2), IL-4 (11B11), IL-13 (13A), IL-17A (TC11-18H10), Ly6G (1A8), Ly6C  
431 (HK1.4), MHC class II (M5/114.15.2), NK1.1 (PK136), PLZF (9E12), ROR $\gamma$ t (Q31-378),  
432 Tbet (O4-46), TCR $\beta$  (H57-597), TNF (MP6-XT22). Antibodies were purchased from BD  
433 Biosciences (San Diego, CA), BioLegend (San Diego, CA), eBioscience (San Diego, CA),  
434 or ThermoFisher Scientific (Carlsbad, CA). Antibodies were biotinylated or conjugated to  
435 Pacific Blue, eFluor 450, Brilliant Violet 421, V500, Brilliant Violet 510, Brilliant Violet 570,  
436 Brilliant Violet 650, Brilliant Violet 711, Brilliant Violet 785, Brilliant Violet 786, FITC, Alexa  
437 Fluor 488, PerCP-Cy5.5, PerCP-eFluor 710, PE, PE-CF594, PE-Cy7, APC, Alexa Fluor  
438 647, eFluor 660, Alexa Fluor 700, APC-Cy7, APC-eFluor 780 or APC-Fire750. Anti-  
439 mouse CD16/32 antibody (2.4G2) used for Fc receptor blocking was obtained from Tonbo  
440 Biosciences. Unconjugated mouse and rat IgG antibodies were purchase from Jackson  
441 ImmunoResearch (West Grove, PA). Dead cells were labeled with Zombie UV Dead Cell

442 Staining Kit (BioLegend). Flow cytometry was performed as described [86]. Graphs  
443 derived from digital data are displayed using a 'bi-exponential display' [87]. The gating  
444 strategy utilized is outlined in the S1 and S2 figures.

445

## 446 **Adjuvant-induced asthma models**

447 Neutrophilic asthma was induced by one injection (d0) per mouse with 0.5 mg/mL CFA  
448 (Complete Freund's Adjuvant, Sigma-Aldrich, St. Louis, MO) mixed with 20 µg OVA  
449 (Ovalbumin, Hyglos, Germany) [15,21]. Eosinophilic asthma was induced by weekly  
450 injections (d0, d7, d14) per mouse of 1 mg Alum ('Imject Alum', ThermoFisher Scientific)  
451 mixed with 20 µg OVA [15,21]. Seven days after the last Alum/OVA injection, all mice  
452 were challenged with 50 µg OVA/mouse by pharyngeal/laryngeal installation once on two  
453 consecutive days (d21, d22). 16-18 hours later, the mice were sacrificed, and the blood,  
454 BALFs, and lungs were collected to assess immune responses by flow cytometry, ELISA,  
455 and immunohistochemistry/immunofluorescence.

456

## 457 **Cell preparation**

458 Bronchoalveolar lavage fluid (BALF) was collected by inflating the murine lungs with 1 mL  
459 ice-cold PBS, which was repeated twice with fresh PBS. The three washes were  
460 centrifugated separately at 400 g for 7 min at 4°C. The supernatant of the first wash was  
461 collected for the ELISA analysis, the cells of all three washes were pooled for the flow  
462 cytometric analysis. Single-cell suspensions from mouse lungs were prepared as  
463 described [88]. In brief, lungs were removed and minced into smaller pieces in a 6-well  
464 plate (Greiner, Germany). The digestion mixture, composed of 1 mg/mL collagenase D  
465 and 0.1 mg/mL DNase I (both from Roche, Switzerland) in complete RPMI medium  
466 (Gibco, USA), was added to the samples and incubated for 30 min at 37°C on a lateral  
467 shaker. The lung samples were filtered through 100 µm mesh with PBS, washed twice,  
468 and the red blood cells were eliminated by ACK lysis buffer (Lonza, US).

469

470

## 471 **ELISA**

472 The IFN $\gamma$ , IL-5, and IL-13 cytokine levels in BALF were measured with the respective  
473 Sandwich-ELISA kits (R&D Systems, MN, US) according to the manufacturer's  
474 instructions. OVA-specific antibodies were measured in the sera, collected from mice via  
475 cardiac puncture, as described [89]. For detecting total IgG, IgG1, IgG2, and IgA  
476 antibodies, the sera were serially diluted and loaded onto 10  $\mu$ g OVA-coated plates. Horse-  
477 radish peroxidase (HRP)-conjugated anti-mouse IgG, IgG1, IgG2, IgA (Southern Biotech,  
478 USA) antibodies were used as detection antibodies. For the detection of OVA-specific  
479 IgE antibodies, the sera were diluted 1/10 with PBS containing 1% (w/v) BSA and loaded  
480 onto anti-mouse IgE coated (BD biosciences) plates. anti-OVA-HRP antibodies (AbD  
481 Serotec, BioRad) were used as detection antibody [89]. The colorimetric change, resulting  
482 from the enzymatic reaction between the HRP portion of detection antibody and the  
483 substrate TMB, was measured as absorbance at 450 nm (OD450) by Spectrophotometer  
484 (Thermo Scientific, Multiskan FC Microplate Photometer). The titers were defined from  
485 the reciprocal value of the absorbance at OD450.

486

## 487 **In vitro stimulation**

488 Lung-derived lymphocytes were stimulated *in vitro* with PMA (50 ng/mL) and ionomycin  
489 (1  $\mu$ g/mL) (both Sigma-Aldrich, St. Louis, MO) for four hours at 37°C in the presence of  
490 both Brefeldin A (GolgiPlug) and Monensin (GolgiStop). As GolgiPlug and GolgiStop  
491 (both BD Biosciences, San Diego, CA) were used together, half the amount  
492 recommended by the manufacturer were used, as suggested previously [90].

493

## 494 **Histology**

495 Lungs were inflated with 4% PFA (Cell Signaling, San Diego, US) and fixed for four hours  
496 on a lateral shaker at 4°C. After dehydration with 30% sucrose overnight on a lateral  
497 shaker at 4°C, samples were embedded in O.C.T (Tissue Tek, Sakura, US) and snap-  
498 frozen. 7-10  $\mu$ m thick sections were prepared with a cryostat (Leica CM 1950). For the  
499 H&E staining, the tissue sections were stained with hematoxylin (Sigma, USA) and eosin

500 (Sigma, USA) for two minutes each. Slide contrast was increased by a brief HCl/ethanol  
501 treatment (1/1000, v/v) (Sigma, USA). Slides were fixed by ascending concentration of  
502 ethanol (70%, 80%, 90%, 95%, 100%) (Sigma, USA) and a final 5 second xylene (Sigma,  
503 USA) treatment. For the Alcian Blue/PAS staining, the tissue sections were stained with  
504 an Alcian Blue/PAS staining kit according to the manufacturer's recommendations (Bio  
505 Optica, Italy). Once the slides dried, they were mounted with entellan and examined with  
506 a light microscope (Olympus IX71). For the immunofluorescence, tissue sections were  
507 stained with CD45R-AF647 (BD Biosciences, San Diego, CA, US) and DAPI  
508 (ThermoFisher Scientific, Carlsbad, CA) and analyzed with a confocal microscope (Zeiss  
509 LSM 880).

510

## 511 **Statistical analysis**

512 Data are presented as mean  $\pm$  standard error of the mean (SEM). The statistical analysis  
513 was performed with GraphPad Prism 7.0 software (GraphPad Software, San Diego, CA).  
514 One-way ANOVA followed by Holm-Sidak posthoc test are used to compare p values  
515 regarded as \* $p \leq 0.05$ , \*\* $p \leq 0.01$ , and \*\*\* $p \leq 0.001$ .

516

517

518 **Acknowledgments**

519 The authors wish to thank the Flow Cytometry Core Facility, Histopathology Core Facility,  
520 Imaging Core Facility, and the vivarium at the Izmir Biomedicine and Genome Center  
521 (IBG) for technical assistance. We are grateful to the NIH Tetramer Core Facility for  
522 providing the PBS57-loaded mouse CD1d tetramers and to Dr. Duygu Sag for critical  
523 reading of the manuscript.

524

525 **Author Contributions**

526 Conceived and designed the experiments: MO, GW. Performed the experiments and  
527 analyzed the data: MO, YCE. Wrote the paper: MO, GW. All authors reviewed and  
528 approved the manuscript.

529

530 **Competing financial interests**

531 The authors have declared that no competing interests exist.

532

533

## 534 **References**

- 535 1. Global initiative for Asthma. Global Strategy for Asthma Management and Prevention,  
536 available from [www.ginasthma.org](http://www.ginasthma.org). 2020.
- 537 2. Agache I, Akdis C, Jutel M, Virchow JC. Untangling asthma phenotypes and  
538 endotypes. Vol. 67, *Allergy: European Journal of Allergy and Clinical Immunology*.  
539 2012. p. 835–46.
- 540 3. Simpson JL, Grissell T V., Douwes J, Scott RJ, Boyle MJ, Gibson PG. Innate immune  
541 activation in neutrophilic asthma and bronchiectasis. *Thorax*. 2007;62(3):211–8.
- 542 4. Lambrecht BN, Hammad H. The immunology of asthma. *Nat Immunol*.  
543 2015;16(1):45–56.
- 544 5. Peters MC, Mekonnen ZK, Yuan S, Bhakta NR, Woodruff PG, Fahy J V. Measures  
545 of gene expression in sputum cells can identify T H2-high and TH2-low subtypes of  
546 asthma. *J Allergy Clin Immunol*. 2014;133(2). Available from:  
547 <http://dx.doi.org/10.1016/j.jaci.2013.07.036>
- 548 6. Hodge S, Hodge G, Simpson JL, Yang IA, Upham J, James A, et al. Blood  
549 cytotoxic/inflammatory mediators in non-eosinophilic asthma. *Clin Exp Allergy*.  
550 2016;46(1):60–70.
- 551 7. McGrath KW, Icitovic N, Boushey HA, Lazarus SC, Sutherland ER, Chinchilli VM, et  
552 al. A large subgroup of mild-to-moderate asthma is persistently noneosinophilic. *Am*  
553 *J Respir Crit Care Med*. 2012;185(6):612–9.
- 554 8. Pavord ID, Beasley R, Agusti A, Anderson GP, Bel E, Brusselle G, et al. After asthma:  
555 redefining airways diseases. *Lancet*. 2018;391(10118):350–400. Available from:  
556 [http://dx.doi.org/10.1016/S0140-6736\(17\)30879-6](http://dx.doi.org/10.1016/S0140-6736(17)30879-6)
- 557 9. Samitas K, Delimpoura V, Zervas E, Gaga M. Anti-IgE treatment, airway inflammation  
558 and remodelling in severe allergic asthma: Current knowledge and future  
559 perspectives. *Eur Respir Rev*. 2015;24(138):594–601. Available from:  
560 <http://dx.doi.org/10.1183/16000617.00001715>
- 561 10. Gibson PG, Simpson JL, Saltos N. Heterogeneity of airway inflammation in persistent

- 562 asthma: Evidence of neutrophilic inflammation and increased sputum interleukin-8.  
563 Chest. 2001;119(5):1329–36. Available from:  
564 <http://dx.doi.org/10.1378/chest.119.5.1329>
- 565 11. McGrath KW, Icitovic N, Boushey HA, Lazarus SC, Sutherland ER, Chinchilli VM, et  
566 al. A large subgroup of mild-to-moderate asthma is persistently noneosinophilic. *Am*  
567 *J Respir Crit Care Med*. 2012;185(6):612–9.
- 568 12. Wadhwa R, Dua K, Adcock IM, Horvat JC, Kim RY, Hansbro PM. Cellular  
569 mechanisms underlying steroid-resistant asthma. *Eur Respir Rev*. 2019;28(153):1–  
570 10. Available from: <http://dx.doi.org/10.1183/16000617.0096-2019>
- 571 13. Sze E, Bhalla A, Nair P. Mechanisms and therapeutic strategies for non-T2 asthma.  
572 *Allergy Eur J Allergy Clin Immunol*. 2020;75(2):311–25.
- 573 14. Whitehead GS, Thomas SY, Cook DN. Modulation of distinct asthmatic phenotypes  
574 in mice by dose-dependent inhalation of microbial products. *Environ Health Perspect*.  
575 2014;122(1):34–42.
- 576 15. Dejager L, Dendoncker K, Eggermont M, Souffriau J, Van Hauwermeiren F, Willart  
577 M, et al. Neutralizing TNF $\alpha$  restores glucocorticoid sensitivity in a mouse model of  
578 neutrophilic airway inflammation. *Mucosal Immunol*. 2015;8(January):1–14.  
579 Available from: <http://www.nature.com/doifinder/10.1038/mi.2015.12>
- 580 16. Mcalees JW, Whitehead GS, Harley ITW, Cappelletti M, Rewerts CL, Holdcroft AM,  
581 et al. Distinct Tlr4 -expressing cell compartments control neutrophilic and eosinophilic  
582 airway inflammation. 2014;8(4):863–73. Available from:  
583 <http://dx.doi.org/10.1038/mi.2014.117>
- 584 17. Kalchier-Dekel O, Yao X, Levine SJ. Meeting the Challenge of Identifying New  
585 Treatments for Type 2-Low Neutrophilic Asthma. *Chest*. 2020;157(1):26–33.  
586 Available from: <https://doi.org/10.1016/j.chest.2019.08.2192>
- 587 18. Kips JC, Anderson GP, Fredberg JJ, Herz U, Inman MD, Jordana M, et al. Murine  
588 models of asthma. *Eur Respir J*. 2003;22(2):374–82.
- 589 19. Yu QL, Chen Z. Establishment of different experimental asthma models in mice. *Exp*  
590 *Ther Med*. 2018;15(3):2492–8.

- 591 20. Jang E, Nguyen QT, Kim S, Kim D, Le THN, Keslar K, et al. Lung-Infiltrating Foxp3 +  
592 Regulatory T Cells Are Quantitatively and Qualitatively Different during Eosinophilic  
593 and Neutrophilic Allergic Airway Inflammation but Essential To Control the  
594 Inflammation. *J Immunol.* 2017;199(12):3943–51.
- 595 21. Bogaert P, Naessens T, de Koker S, Hennuy B, Hacha J, Smet M, et al. Inflammatory  
596 signatures for eosinophilic vs. neutrophilic allergic pulmonary inflammation reveal  
597 critical regulatory checkpoints. *Am J Physiol - Lung Cell Mol Physiol.*  
598 2011;300(5):679–90.
- 599 22. Haspeslagh E, Debeuf N, Hammad H, Lambrecht BN. Murine models of allergic  
600 asthma. *Methods Mol Biol.* 2017;1559:121–36.
- 601 23. Hayashi N, Yoshimoto T, Izuhara K, Matsui K, Tanaka T, Nakanishi K. T helper 1  
602 cells stimulated with ovalbumin and IL-18 induce airway hyperresponsiveness and  
603 lung fibrosis by IFN- $\gamma$  and IL-13 production. *Proc Natl Acad Sci U S A.*  
604 2007;104(37):14765–70.
- 605 24. Dejager L, Dendoncker K, Eggermont M, Souffriau J, Van Hauwermeiren F, Willart  
606 M, et al. Neutralizing TNF $\alpha$  restores glucocorticoid sensitivity in a mouse model of  
607 neutrophilic airway inflammation. *Mucosal Immunol* . 2015;8(January):1–14.  
608 Available from: <http://dx.doi.org/10.1038/mi.2015.12>
- 609 25. Wilson RH, Whitehead GS, Nakano H, Free ME, Kolls JK, Cook DN. Allergic  
610 Sensitization through the Airway Primes Th17-dependent Neutrophilia and Airway  
611 Hyperresponsiveness.
- 612 26. Sadamatsu H, Takahashi K, Tashiro H, Kato G, Noguchi Y, Kurata K, et al. The non-  
613 antibiotic macrolide EM900 attenuates HDM and poly(I:C)-induced airway  
614 inflammation with inhibition of macrophages in a mouse model. *Inflamm Res.*  
615 2020;69(1):139–51.
- 616 27. Edwards MR, Saglani S, Schwarze J, Skevaki C, Smith JA, Ainsworth B, et al.  
617 Addressing unmet needs in understanding asthma mechanisms . Vol. 49, *European*  
618 *Respiratory Journal.* 2017. Available from:  
619 <http://dx.doi.org/10.1183/13993003.02448-2016>



- 620 28. Agache I, Cojanu C, Rogozea L. Endotype-driven approach for asthma. Implement  
621       Precis Med Best Pract Chronic Airw Dis. 2018;45–9.
- 622 29. Wu W, Bleecker E, Moore W, Busse WW, Castro M, Chung KF, et al. Unsupervised  
623       phenotyping of Severe Asthma Research Program participants using expanded lung  
624       data. *J Allergy Clin Immunol* . 2014;133(5):1280–8. Available from:  
625       <http://dx.doi.org/10.1016/j.jaci.2013.11.042>
- 626 30. Ray A, Kolls JK. Neutrophilic Inflammation in Asthma and Association with Disease  
627       Severity. *Trends Immunol* . 2017;xx:1–13. Available from:  
628       <http://dx.doi.org/10.1016/j.it.2017.07.003>
- 629 31. Huang YC, Weng CM, Lee MJ, Lin SM, Wang CH, Kuo HP. Endotypes of severe  
630       allergic asthma patients who clinically benefit from anti-IgE therapy. *Clin Exp Allergy*.  
631       2019;49(1):44–53.
- 632 32. Ray A, Kolls JK. Neutrophilic Inflammation in Asthma and Association with Disease  
633       Severity. *Trends Immunol* . 2017;38(12):942–54. Available from:  
634       <http://dx.doi.org/10.1016/j.it.2017.07.003>
- 635 33. Verduyn M, Botto G, Jaubert J, Lier C, Flament T, Guilleminault L. Serum IgG  
636       Concentrations in Adult Patients Experiencing Virus-Induced Severe Asthma  
637       Exacerbations. *J Allergy Clin Immunol Pract*. 2019;7(5):1507-1513.e1.
- 638 34. Upham JW, Denburg JA, O’Byrne PM. Rapid response of circulating myeloid dendritic  
639       cells to inhaled allergen in asthmatic subjects. *Clin Exp Allergy*. 2002;32(6):818–23.
- 640 35. Byrne AJ, Maher TM, Lloyd CM. Pulmonary Macrophages: A New Therapeutic  
641       Pathway in Fibrosing Lung Disease? *Trends Mol Med* . 2016;22(4):303–16. Available  
642       from: <http://dx.doi.org/10.1016/j.molmed.2016.02.004>
- 643 36. Ginhoux F, Guilliams M. Tissue-Resident Macrophage Ontogeny and Homeostasis.  
644       *Immunity* . 2016;44(3):439–49. Available from:  
645       <http://dx.doi.org/10.1016/j.immuni.2016.02.024>
- 646 37. Evren E, Ringqvist E, Willinger T. Origin and ontogeny of lung macrophages: from  
647       mice to humans. *Immunology*. 2020;160(2):126–38.
- 648 38. Gibbings SL, Thomas SM, Atif SM, McCubbrey AL, Desch AN, Danhorn T, et al.

- 649 Three unique interstitial macrophages in the murine lung at steady state. *Am J Respir*  
650 *Cell Mol Biol.* 2017;57(1):66–76.
- 651 39. Taut K, Winter C, Briles DE, Paton JC, Christman JW, Maus R, et al. Macrophage  
652 turnover kinetics in the lungs of mice infected with *Streptococcus pneumoniae*. *Am J*  
653 *Respir Cell Mol Biol.* 2008;38(1):105–13.
- 654 40. Osterholzer JJ, Chen GH, Olszewski MA, Zhang YM, Curtis JL, Huffnagle GB, et al.  
655 Chemokine receptor 2-mediated accumulation of fungicidal exudate macrophages in  
656 mice that clear cryptococcal lung infection. *Am J Pathol.* 2011;178(1):198–211.  
657 Available from: <http://dx.doi.org/10.1016/j.ajpath.2010.11.006>
- 658 41. Osterholzer JJ, Olszewski MA, Murdock BJ, Chen G-H, Erb-Downward JR, Subbotina  
659 N, et al. Implicating Exudate Macrophages and Ly-6C high Monocytes in CCR2-  
660 Dependent Lung Fibrosis following Gene-Targeted Alveolar Injury. *J Immunol.*  
661 2013;190(7):3447–57.
- 662 42. Herbold W, Maus R, Hahn I, Ding N, Srivastava M, Christman JW, et al. Importance  
663 of CXC chemokine receptor 2 in alveolar neutrophil and exudate macrophage  
664 recruitment in response to pneumococcal lung infection. *Infect Immun.*  
665 2010;78(6):2620–30.
- 666 43. Gelfand EW, Joetham A, Wang M, Takeda K, Schedel M. Spectrum of T-lymphocyte  
667 activities regulating allergic lung inflammation. *Immunol Rev.* 2017 Jul;278(1):63–86.
- 668 44. Robinson DS. The role of the T cell in asthma. *J Allergy Clin Immunol.*  
669 2010;126(6):1081–91. Available from: <http://dx.doi.org/10.1016/j.jaci.2010.06.025>
- 670 45. Akbari O, Stock P, Meyer E, Kronenberg M, Sidobre S, Nakayama T, et al. Essential  
671 role of NKT cells producing IL-4 and IL-13 in the development of allergen-induced  
672 airway hyperreactivity. *Nat Med.* 2003;9(5):582–8.
- 673 46. Akbari O, Umetsu DT. Natural killer T cells and CD8(+) T cells are dispensable for T  
674 cell-dependent allergic airway inflammation - Reply. *Nat Med.* 2006;12(12):1347.
- 675 47. Lisbonne M, Diem S, de Castro Keller A, Lefort J, Araujo LM, Hachem P, et al. Cutting  
676 edge: invariant V alpha 14 NKT cells are required for allergen-induced airway  
677 inflammation and hyperreactivity in an experimental asthma model. *J Immunol.*

- 678 2003;171(4):1637–41.
- 679 48. Wingender G, Rogers P, Batzer G, Lee MS, Bai D, Pei B, et al. Invariant NKT cells  
680 are required for airway inflammation induced by environmental antigens. *J Exp Med*  
681 . 2011;208(6):1151–62. Available from:  
682 <http://www.jem.org/lookup/doi/10.1084/jem.20102229>
- 683 49. Lambrecht BN, Hammad H. The immunology of asthma. *Nat Immunol* .  
684 2014;16(1):45–56. Available from: <http://www.ncbi.nlm.nih.gov/pubmed/25521684>
- 685 50. Wypych TP, Marzi R, Wu GF, Lanzavecchia A, Sallusto F. Role of B cells in TH cell  
686 responses in a mouse model of asthma. *J Allergy Clin Immunol* . 2018;141(4):1395–  
687 410. Available from: <https://doi.org/10.1016/j.jaci.2017.09.001>
- 688 51. Foo SY, Phipps S. Regulation of inducible BALM formation and contribution to  
689 immunity and pathology. *Mucosal Immunol*. 2010;3(6):537–44.
- 690 52. Marin ND, Dunlap MD, Kaushal D, Khader SA. Friend or Foe: The Protective and  
691 Pathological Roles of Inducible Bronchus-Associated Lymphoid Tissue in Pulmonary  
692 Diseases. *J Immunol*. 2019;202(9):2519–26.
- 693 53. Radermecker C, Sabatel C, Vanwinge C, Ruscitti C, Maréchal P, Perin F, et al.  
694 Locally instructed CXCR4hi neutrophils trigger environment-driven allergic asthma  
695 through the release of neutrophil extracellular traps. *Nat Immunol* .  
696 2019;20(11):1444–55. Available from: <http://dx.doi.org/10.1038/s41590-019-0496-9>
- 697 54. Woo LN, Guo WY, Wang X, Young A, Salehi S, Hin A, et al. A 4-Week Model of  
698 House Dust Mite ( HDM ) Induced Allergic Airways Inflammation with Airway  
699 Remodeling. 2018;(December 2017):1–11.
- 700 55. Cyphert-Daly JM, Yang Z, Ingram JL, Tighe RM, Que LG. Physiologic response to  
701 chronic house dust mite exposure in mice is dependent on lot characteristics. *J*  
702 *Allergy Clin Immunol*. 2019;144(5):1428-1432.e8.
- 703 56. Fallon PG, Schwartz C. The high and lows of type 2 asthma and mouse models. *J*  
704 *Allergy Clin Immunol* . 2020;145(2):496–8. Available from:  
705 <https://doi.org/10.1016/j.jaci.2019.11.031>
- 706 57. Korošec P, Gibbs BF, Rijavec M, Custovic A, Turner PJ. Important and specific role

- 707 for basophils in acute allergic reactions. *Clin Exp Allergy*. 2018;48(5):502–12.
- 708 58. Wakahara K, Van VQ, Baba N, Bégin P, Rubio M, Delespesse G, et al. Basophils are  
709 recruited to inflamed lungs and exacerbate memory Th2 responses in mice and  
710 humans. *Allergy Eur J Allergy Clin Immunol*. 2013;68(2):180–9.
- 711 59. Reber LL, Sibilano R, Mukai K, Galli SJ. Potential effector and immunoregulatory  
712 functions of mast cells in mucosal immunity. *Mucosal Immunol*. 2015;8(3):444–63.
- 713 60. Sawaguchi M, Tanaka S, Nakatani Y, Harada Y, Mukai K, Matsunaga Y, et al. Role  
714 of Mast Cells and Basophils in IgE Responses and in Allergic Airway  
715 Hyperresponsiveness. *J Immunol*. 2012;188(4):1809–18.
- 716 61. Carroll NG, Mutavdzic S, James AL. Distribution and degranulation of airway mast  
717 cells in normal and asthmatic subjects. *Eur Respir J*. 2002;19(5):879–85.
- 718 62. Carroll NG. Increased mast cells and neutrophils in submucosal mucous glands and  
719 mucus plugging in patients with asthma. *Thorax* . 2002 Aug 1;57(8):677–82. Available  
720 from: <https://thorax.bmj.com/lookup/doi/10.1136/thorax.57.8.677>
- 721 63. Balzar S, Fajt ML, Comhair SAA, Erzurum SC, Bleecker E, Busse WW, et al. Mast  
722 cell phenotype, location, and activation in severe asthma: Data from the Severe  
723 Asthma Research Program. *Am J Respir Crit Care Med*. 2011;183(3):299–309.
- 724 64. Hammad H, Plantinga M, Deswarte K, Pouliot P, Willart MAM, Kool M, et al.  
725 Inflammatory dendritic cells - not basophils - are necessary and sufficient for induction  
726 of Th2 immunity to inhaled house dust mite allergen. *J Exp Med*. 2010;207(10):2097–  
727 111.
- 728 65. Maazi H, Lam J, Lombardi V, Akbari O. Role of plasmacytoid dendritic cell subsets in  
729 allergic asthma. *Allergy Eur J Allergy Clin Immunol*. 2013;68(6):695–701.
- 730 66. Heer HJ De, Hammad H, Soullié T, Hijdra D, Vos N, Willart MAM, et al. Essential  
731 Role of Lung Plasmacytoid Dendritic Cells in Preventing Asthmatic Reactions to  
732 Harmless Inhaled Antigen. 2004;200(1).
- 733 67. Kool M, van Nimwegen M, Willart MAM, Muskens F, Boon L, Smit JJ, et al. An Anti-  
734 Inflammatory Role for Plasmacytoid Dendritic Cells in Allergic Airway Inflammation. *J*  
735 *Immunol*. 2009;183(2):1074–82.

- 736 68. Lynch JP, Werder RB, Loh Z, Sikder MAA, Curren B, Zhang V, et al. Plasmacytoid  
737 dendritic cells protect from viral bronchiolitis and asthma through semaphorin 4a-  
738 mediated T reg expansion. *J Exp Med*. 2018;215(2):537–57.
- 739 69. Maazi H, Banie H, Aleman Muench GR, Patel N, Wang B, Sankaranarayanan I, et al.  
740 Activated plasmacytoid dendritic cells regulate type 2 innate lymphoid cell–mediated  
741 airway hyperreactivity. *J Allergy Clin Immunol* . 2018;141(3):893-905.e6. Available  
742 from: <http://dx.doi.org/10.1016/j.jaci.2017.04.043>
- 743 70. Bratke K, Lommatzsch M, Julius P, Kuepper M, Kleine HD, Luttmann W, et al.  
744 Dendritic cell subsets in human bronchoalveolar lavage fluid after segmental allergen  
745 challenge. *Thorax*. 2007;62(2):168–75.
- 746 71. Dua B, Watson RM, Gauvreau GM, O'Byrne PM. Myeloid and plasmacytoid dendritic  
747 cells in induced sputum after allergen inhalation in subjects with asthma. *J Allergy*  
748 *Clin Immunol* . 2010;126(1):133–9. Available from:  
749 <http://dx.doi.org/10.1016/j.jaci.2010.04.006>
- 750 72. Zhou X, Moore BB. Location or origin? What is critical for macrophage propagation  
751 of lung fibrosis? *Eur Respir J*. 2018;51(3):1–4.
- 752 73. Machado-Aranda D, V. Suresh M, Yu B, Dolgachev V, Hemmila MR, Raghavendran  
753 K. Alveolar macrophage depletion increases the severity of acute inflammation  
754 following nonlethal unilateral lung contusion in mice. *J Trauma Acute Care Surg*.  
755 2014;76(4):982–90.
- 756 74. Maus UA, Janzen S, Wall G, Srivastava M, Blackwell TS, Christman JW, et al.  
757 Resident alveolar macrophages are replaced by recruited monocytes in response to  
758 endotoxin-induced lung inflammation. *Am J Respir Cell Mol Biol*. 2006;35(2):227–35.
- 759 75. Mould KJ, Barthel L, Mohning MP, Thomas SM, McCubbrey AL, Danhorn T, et al.  
760 Cell origin dictates programming of resident versus recruited macrophages during  
761 acute lung injury. *Am J Respir Cell Mol Biol*. 2017;57(3):294–306.
- 762 76. Zaslona Z, Przybranowski S, Wilke C, van Rooijen N, Teitz-Tennenbaum S,  
763 Osterholzer JJ, et al. Resident Alveolar Macrophages Suppress, whereas Recruited  
764 Monocytes Promote, Allergic Lung Inflammation in Murine Models of Asthma. *J*

- 765 Immunol. 2014;193(8):4245–53.
- 766 77. Misharin A V., Morales-Nebreda L, Reyfman PA, Cuda CM, Walter JM, McQuattie-  
767 Pimentel AC, et al. Monocyte-derived alveolar macrophages drive lung fibrosis and  
768 persist in the lung over the life span. *J Exp Med*. 2017;214(8):2387–404.
- 769 78. Sabatel C, Radermecker C, Fievez L, Paulissen G, Chakarov S, Fernandes C, et al.  
770 Exposure to Bacterial CpG DNA Protects from Airway Allergic Inflammation by  
771 Expanding Regulatory Lung Interstitial Macrophages. *Immunity* . 2017;46(3):457–73.  
772 Available from: <http://dx.doi.org/10.1016/j.immuni.2017.02.016>
- 773 79. Meziani L, Mondini M, Petit B, Boissonnas A, De Montpreville VT, Mercier O, et al.  
774 CSF1R inhibition prevents radiation pulmonary fibrosis by depletion of interstitial  
775 macrophages. *Eur Respir J* . 2018;51(3):1–13. Available from:  
776 <http://dx.doi.org/10.1183/13993003.02120-2017>
- 777 80. Lin KL, Suzuki Y, Nakano H, Ramsburg E, Gunn MD. CCR2 + Monocyte-Derived  
778 Dendritic Cells and Exudate Macrophages Produce Influenza-Induced Pulmonary  
779 Immune Pathology and Mortality . *J Immunol*. 2008;180(4):2562–72.
- 780 81. He X, Qian Y, Li Z, Fan EK, Li Y, Wu L, et al. TLR4-Upregulated IL-1 $\beta$  and IL-1RI  
781 Promote Alveolar Macrophage Pyroptosis and Lung Inflammation through an  
782 Autocrine Mechanism. *Sci Rep* . 2016;6(April):1–11. Available from:  
783 <http://dx.doi.org/10.1038/srep31663>
- 784 82. Al-Ramli W, Préfontaine D, Chouiali F, Martin JG, Olivenstein R, Lemièrre C, et al.  
785 TH17-associated cytokines (IL-17A and IL-17F) in severe asthma. *J Allergy Clin*  
786 *Immunol*. 2009;123(5):1185–7.
- 787 83. Ghosh S, Hoselton SA, Asbach S V., Steffan BN, Wanjara SB, Dorsam GP, et al. B  
788 lymphocytes regulate airway granulocytic inflammation and cytokine production in a  
789 murine model of fungal allergic asthma. *Cell Mol Immunol*. 2015;12(2):202–12.
- 790 84. Shinoda K, Hirahara K, Nakayama T. Maintenance of pathogenic Th2 cells in allergic  
791 disorders. *Allergol Int* . 2017;66(3):369–76. Available from:  
792 <http://dx.doi.org/10.1016/j.alit.2017.03.005>
- 793 85. Hirahara K, Shinoda K, Endo Y, Ichikawa T, Nakayama T. Maintenance of memory-

- 794 type pathogenic Th2 cells in the pathophysiology of chronic airway inflammation.  
795 *Inflamm Regen*. 2018;38(1):8–11.
- 796 86. Wingender G, Birkholz a. M, Sag D, Farber E, Chitale S, Howell a. R, et al. Selective  
797 Conditions Are Required for the Induction of Invariant NKT Cell Hyporesponsiveness  
798 by Antigenic Stimulation. *J Immunol* . 2015;195(8):3838–48. Available from:  
799 <http://www.jimmunol.org/cgi/doi/10.4049/jimmunol.1500203>
- 800 87. Roederer M, Darzynkiewicz Z, Parks DR. Guidelines for the presentation of flow  
801 cytometric data. *Methods Cell Biol*. 2004;2004(75):241–56.
- 802 88. Moro K, Ealey KN, Kabata H, Koyasu S. Isolation and analysis of group 2 innate  
803 lymphoid cells in mice. *Nat Protoc* . 2015;10(5):792–806. Available from:  
804 <http://dx.doi.org/10.1038/nprot.2015.047>
- 805 89. Kuroda E, Ozasa K, Temizoz B, Ohata K, Koo CX, Kanuma T, et al. Inhaled Fine  
806 Particles Induce Alveolar Macrophage Death and Interleukin-1 $\alpha$  Release to Promote  
807 Inducible Bronchus-Associated Lymphoid Tissue Formation. *Immunity* .  
808 2016;45(6):1299–310. Available from:  
809 <http://linkinghub.elsevier.com/retrieve/pii/S1074761316304824>
- 810 90. Maecker HT. Multiparameter Flow Cytometry Monitoring of T Cell Responses. In:  
811 Prasad VR, Kalpana G V, editors. *HIV Protocols* . Totowa, NJ: Humana Press; 2009.  
812 p. 375–91. Available from: [https://doi.org/10.1007/978-1-59745-170-3\\_25](https://doi.org/10.1007/978-1-59745-170-3_25)  
813



814 **Supplemental figure legends**

815 **S1 Fig: Gating strategy to identify myeloid cells in the inflamed lung.** A graphic  
816 outline **(A)** and exemplary graphs **(B)** are given to illustrate the gating strategy employed  
817 to identify myeloid cells in the lung and BALF. Alveolar macrophages (AMs): live CD45<sup>+</sup>  
818 CD19<sup>-</sup> Siglec-F<sup>+</sup> Ly6G<sup>-</sup> CD11c<sup>+</sup> cells; Basophils: live CD45<sup>+</sup> CD19<sup>-</sup> Siglec-F<sup>-</sup> Ly6G<sup>-</sup> CD11b<sup>+</sup>  
819 FcεRIα<sup>+</sup> CD117<sup>-</sup> cells; Conventional DCs (cDC): live CD45<sup>+</sup> CD19<sup>-</sup> Siglec-F<sup>-</sup> Ly6G<sup>-</sup> CD24<sup>+</sup>  
820 CD11c<sup>+</sup> MHC class II<sup>+</sup> CD103<sup>-</sup> CD11b<sup>+</sup> cells; CD103<sup>+</sup> DCs: live CD45<sup>+</sup> CD19<sup>-</sup> Siglec-F<sup>-</sup>  
821 Ly6G<sup>-</sup> CD24<sup>+</sup> CD11c<sup>+</sup> MHC class II<sup>+</sup> CD103<sup>+</sup> cells; Dendritic cells (all): live CD19<sup>-</sup> CD45<sup>+</sup>  
822 Siglec-F<sup>-</sup> Ly6G<sup>-</sup> F4/80<sup>-</sup> CD64<sup>-</sup> CD24<sup>+</sup> CD11c<sup>+</sup> MHC class II<sup>+/-</sup>; Eosinophils: live CD45<sup>+</sup>  
823 CD19<sup>-</sup> CD11c<sup>-</sup> CD11b<sup>-</sup> Ly6G<sup>-</sup> Siglec-F<sup>+</sup> cells; Exudate macrophages (ExMs): live CD45<sup>+</sup>  
824 CD19<sup>-</sup> Siglec-F<sup>-</sup> Ly6G<sup>-</sup> CD24<sup>-</sup> F4/80<sup>+</sup> CD64<sup>+/-</sup> Ly6C<sup>+</sup> CD11b<sup>+</sup> cells; Interstitial macrophages  
825 (IMs): live CD45<sup>+</sup> CD19<sup>-</sup> Siglec-F<sup>-</sup> Ly6G<sup>-</sup> CD24<sup>-</sup> F4/80<sup>+</sup> CD64<sup>+/-</sup> Ly6C<sup>+</sup> CD11b<sup>-</sup> cells;  
826 Neutrophils: live CD45<sup>+</sup> CD19<sup>-</sup> CD11b<sup>+/lo</sup> Ly6G<sup>+</sup> cells; Macrophages (all): live CD19<sup>-</sup>  
827 CD45<sup>+</sup> Siglec-F<sup>-</sup> Ly6G<sup>-</sup> F4/80<sup>+</sup> CD64<sup>+</sup> cells; Mast cells: live CD45<sup>+</sup> CD19<sup>-</sup> Siglec-F<sup>-</sup> Ly6G<sup>-</sup>  
828 CD11b<sup>+</sup> FcεRIα<sup>+</sup> CD117<sup>+</sup> cells; Plasmacytoid dendritic cells: pDC, live CD19<sup>-</sup> CD45<sup>+</sup>  
829 Siglec-F<sup>-</sup> Ly6G<sup>-</sup> CD11b<sup>-</sup> CD45R<sup>+</sup> Ly6C<sup>+</sup> cells.

830

831 **S2 Fig: Gating strategy to identify lymphoid cells in the inflamed lung.** A graphic  
832 outline **(A)** and exemplary graphs **(B)** are given to illustrate the gating strategy employed  
833 to identify lymphoid cells in the lung and BALF. Th1 cells (live CD19/CD45R<sup>-</sup> CD3ε<sup>+</sup> CD4<sup>+</sup>  
834 Tbet<sup>+</sup> cells), Th2 cells (live CD19/B220<sup>-</sup> CD3ε<sup>+</sup> CD4<sup>+</sup> Gata3<sup>+</sup> cells), Th17 cells (live  
835 CD19/CD45R<sup>-</sup> CD3ε<sup>+</sup> CD4<sup>+</sup> RORγt<sup>+</sup> cells), and Tregs (live CD19/CD45R<sup>-</sup> CD3ε<sup>+</sup> CD4<sup>+</sup>  
836 CD127<sup>lo/-</sup> FoxP3<sup>+</sup>), *i*NKT cells (live CD19/CD45R<sup>-</sup> CD3ε<sup>+</sup> CD1d/PBS57-tetramer<sup>+</sup> cells)  
837 and its subsets in the lung NKT1 (PLZF<sup>lo</sup> RORγt<sup>-</sup>), NKT2 cells (PLZF<sup>int/hi</sup> RORγt<sup>-</sup>), NKT17  
838 cells (PLZF<sup>int</sup> RORγt<sup>+</sup>) cells are shown.

839



A

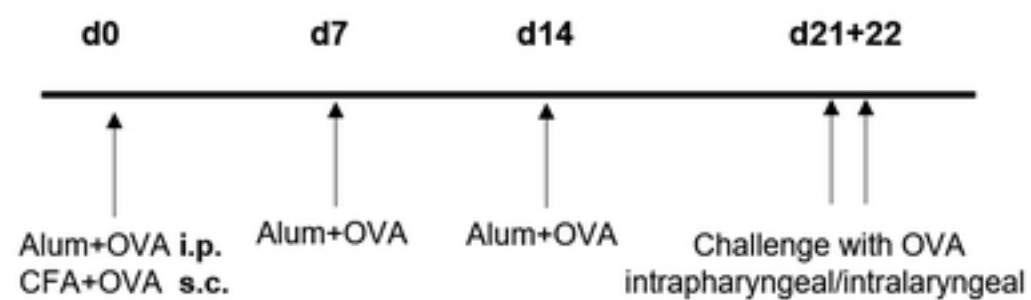

B

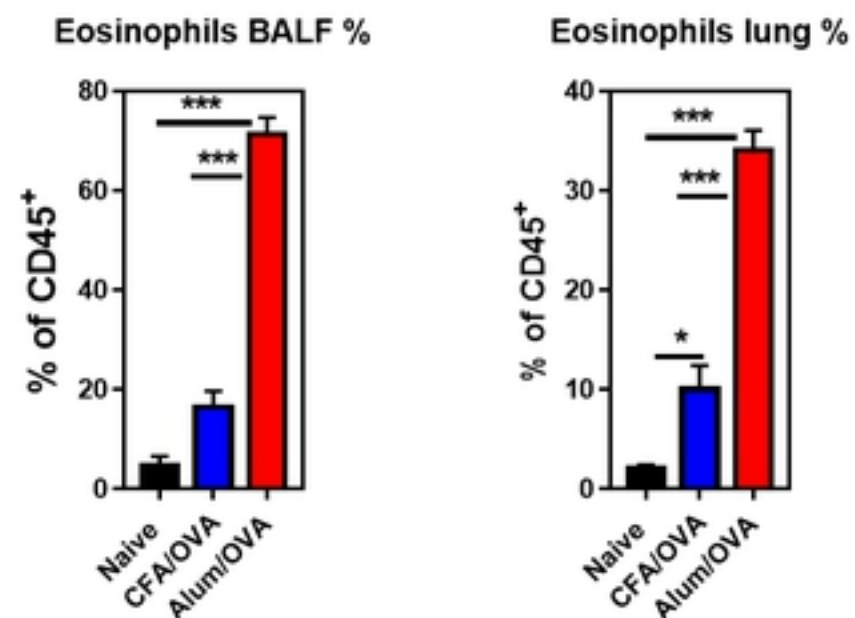

C

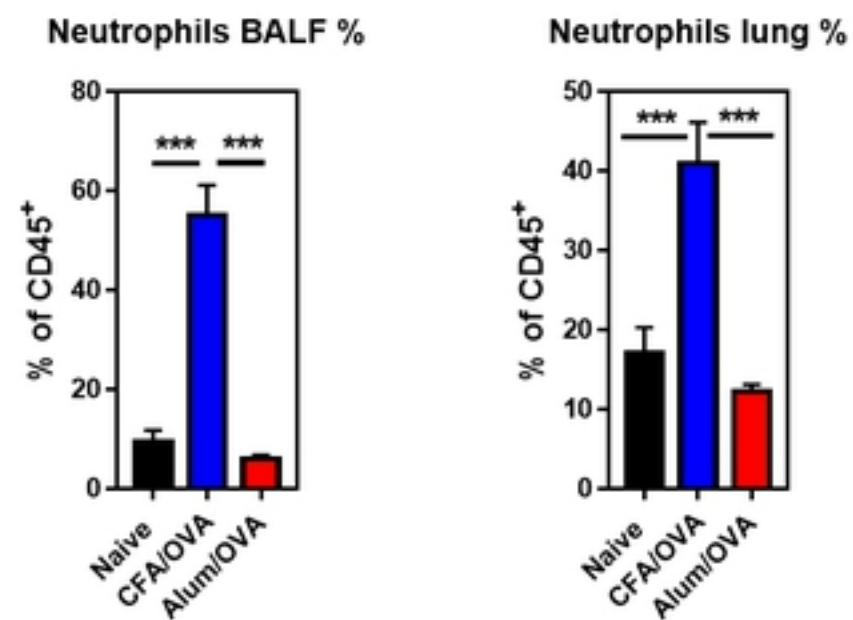

D

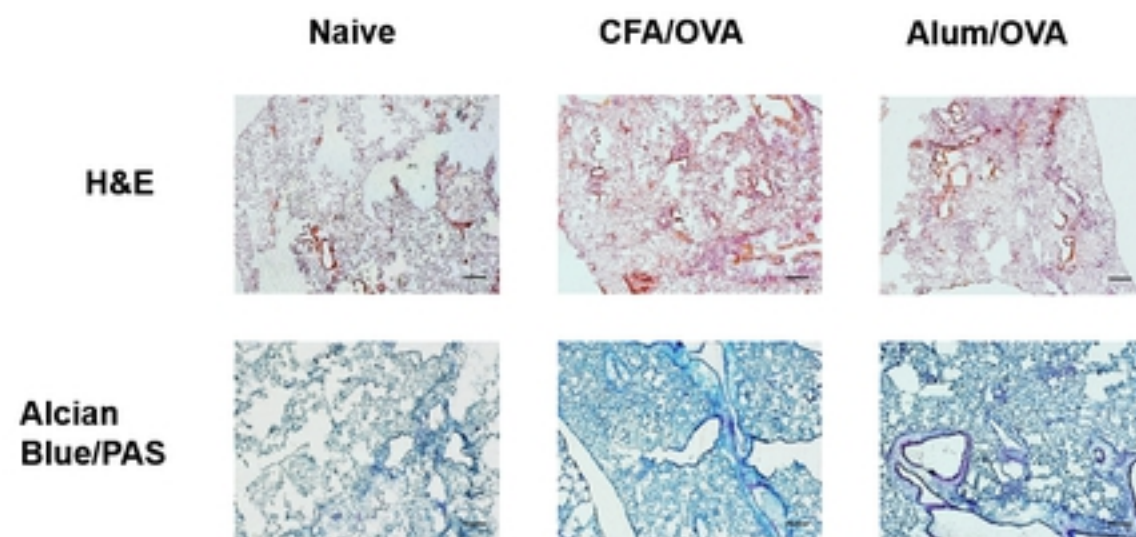

Fig 1 A-D

**E**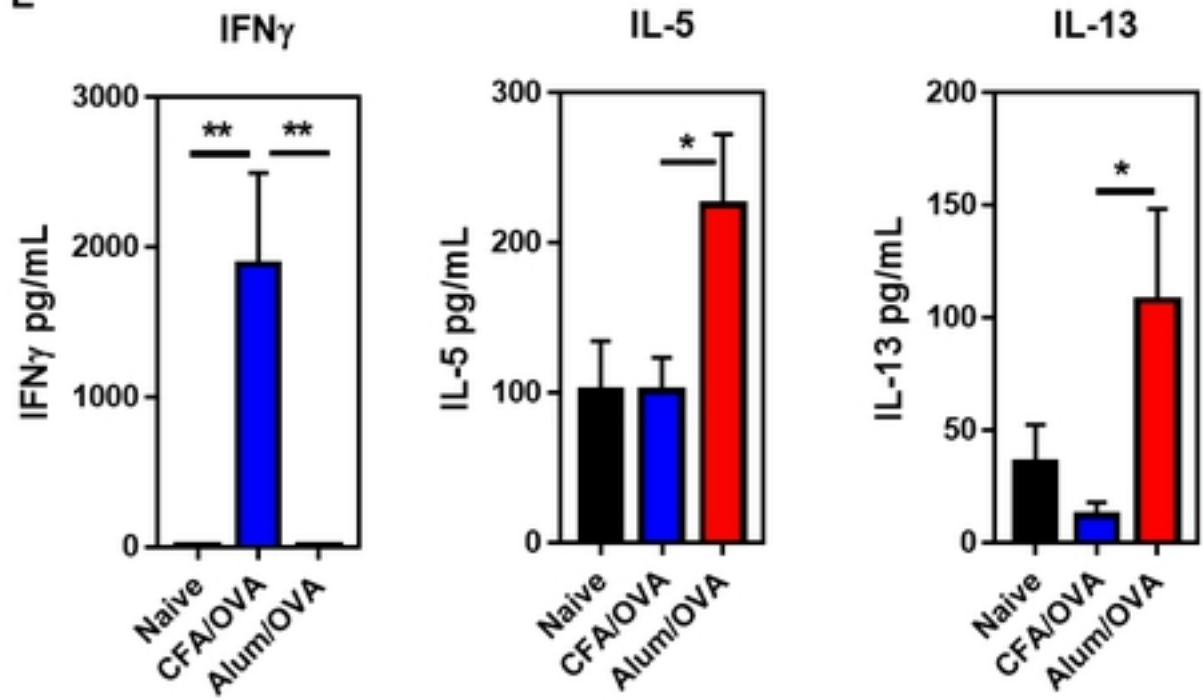**F**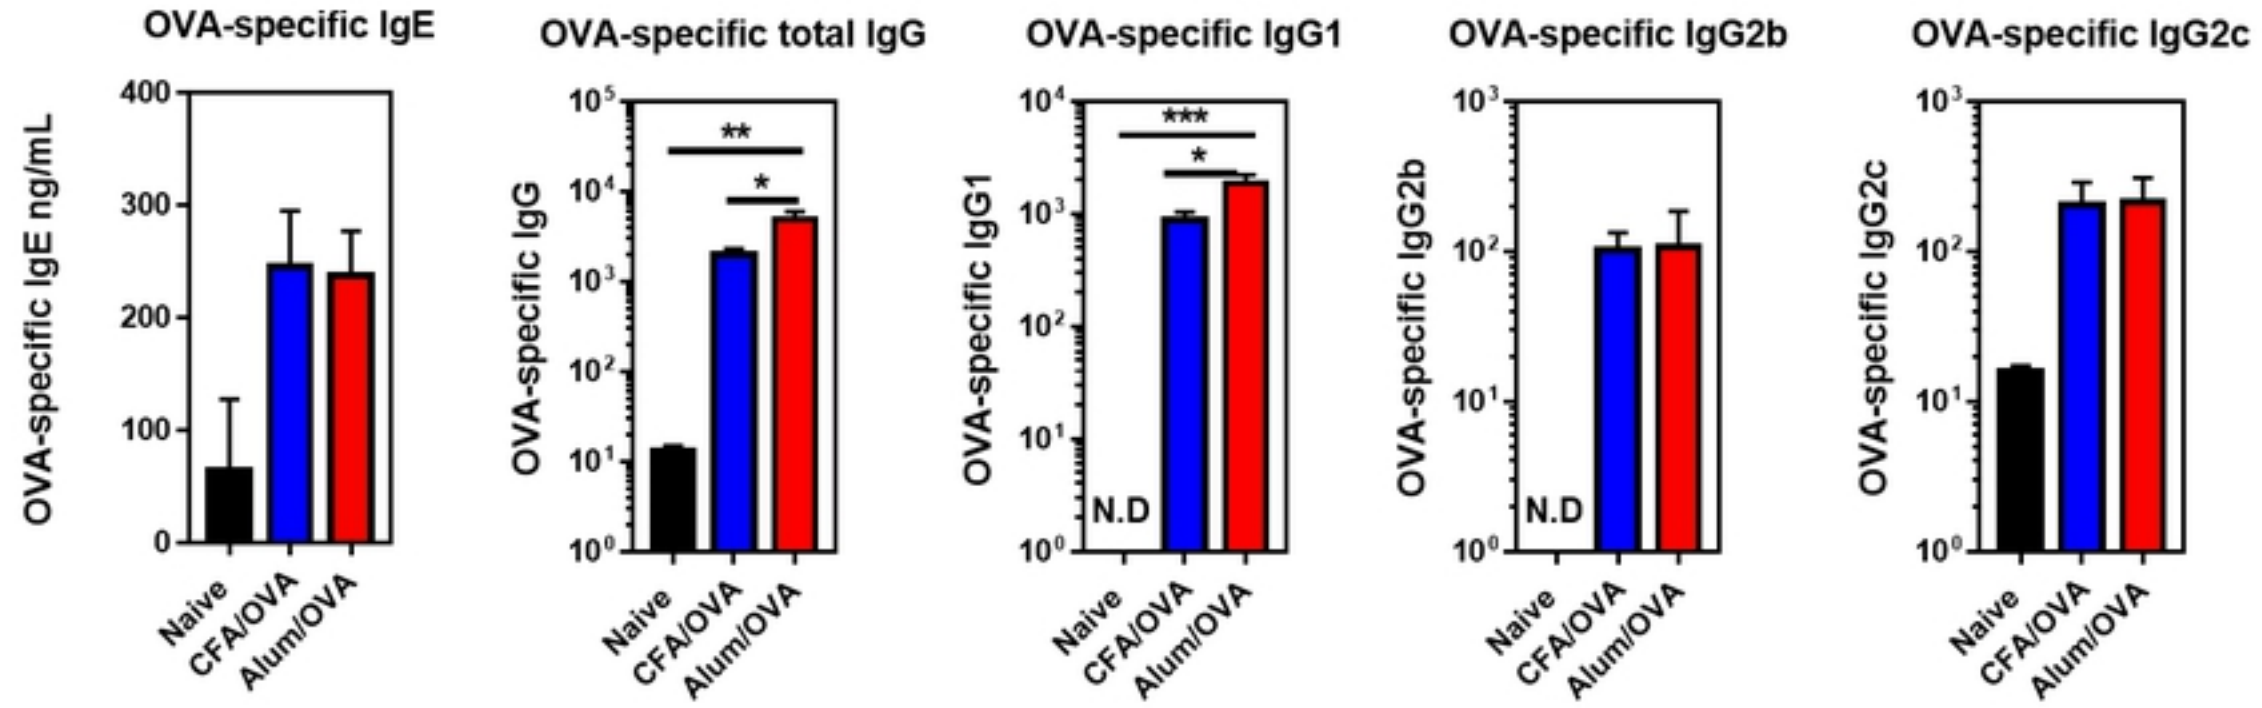

Fig 1 E-F

E

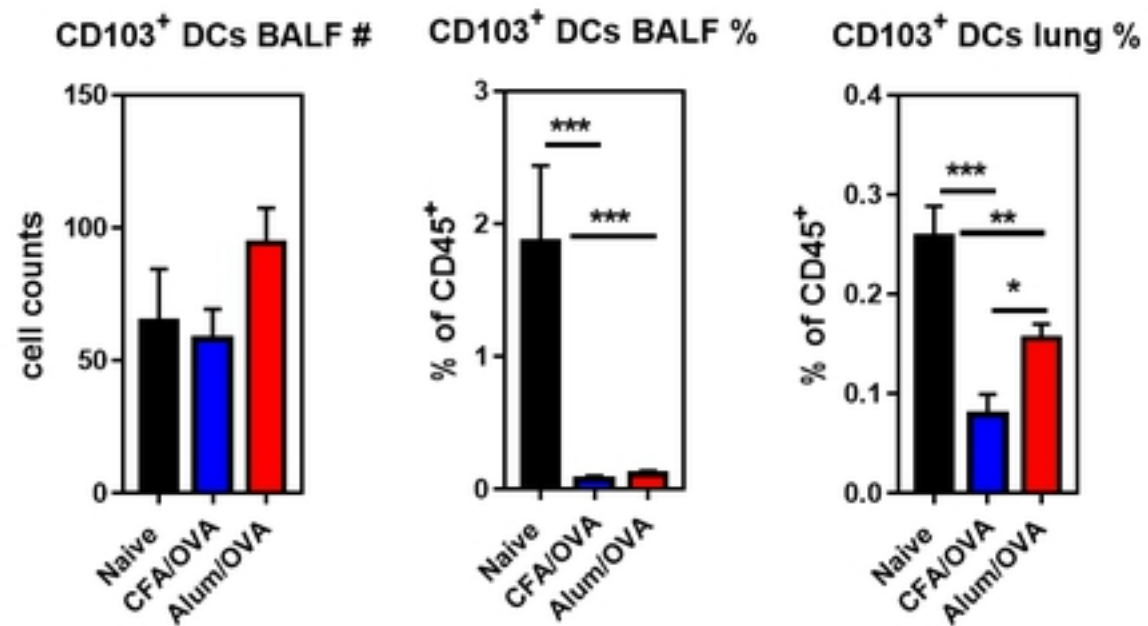

F

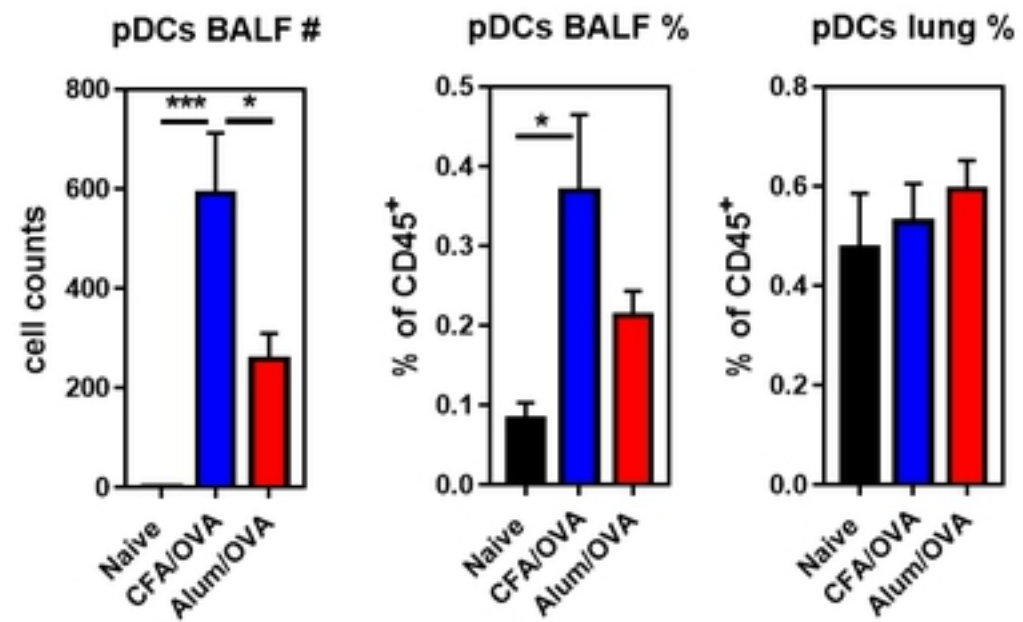

Fig 2 E-F

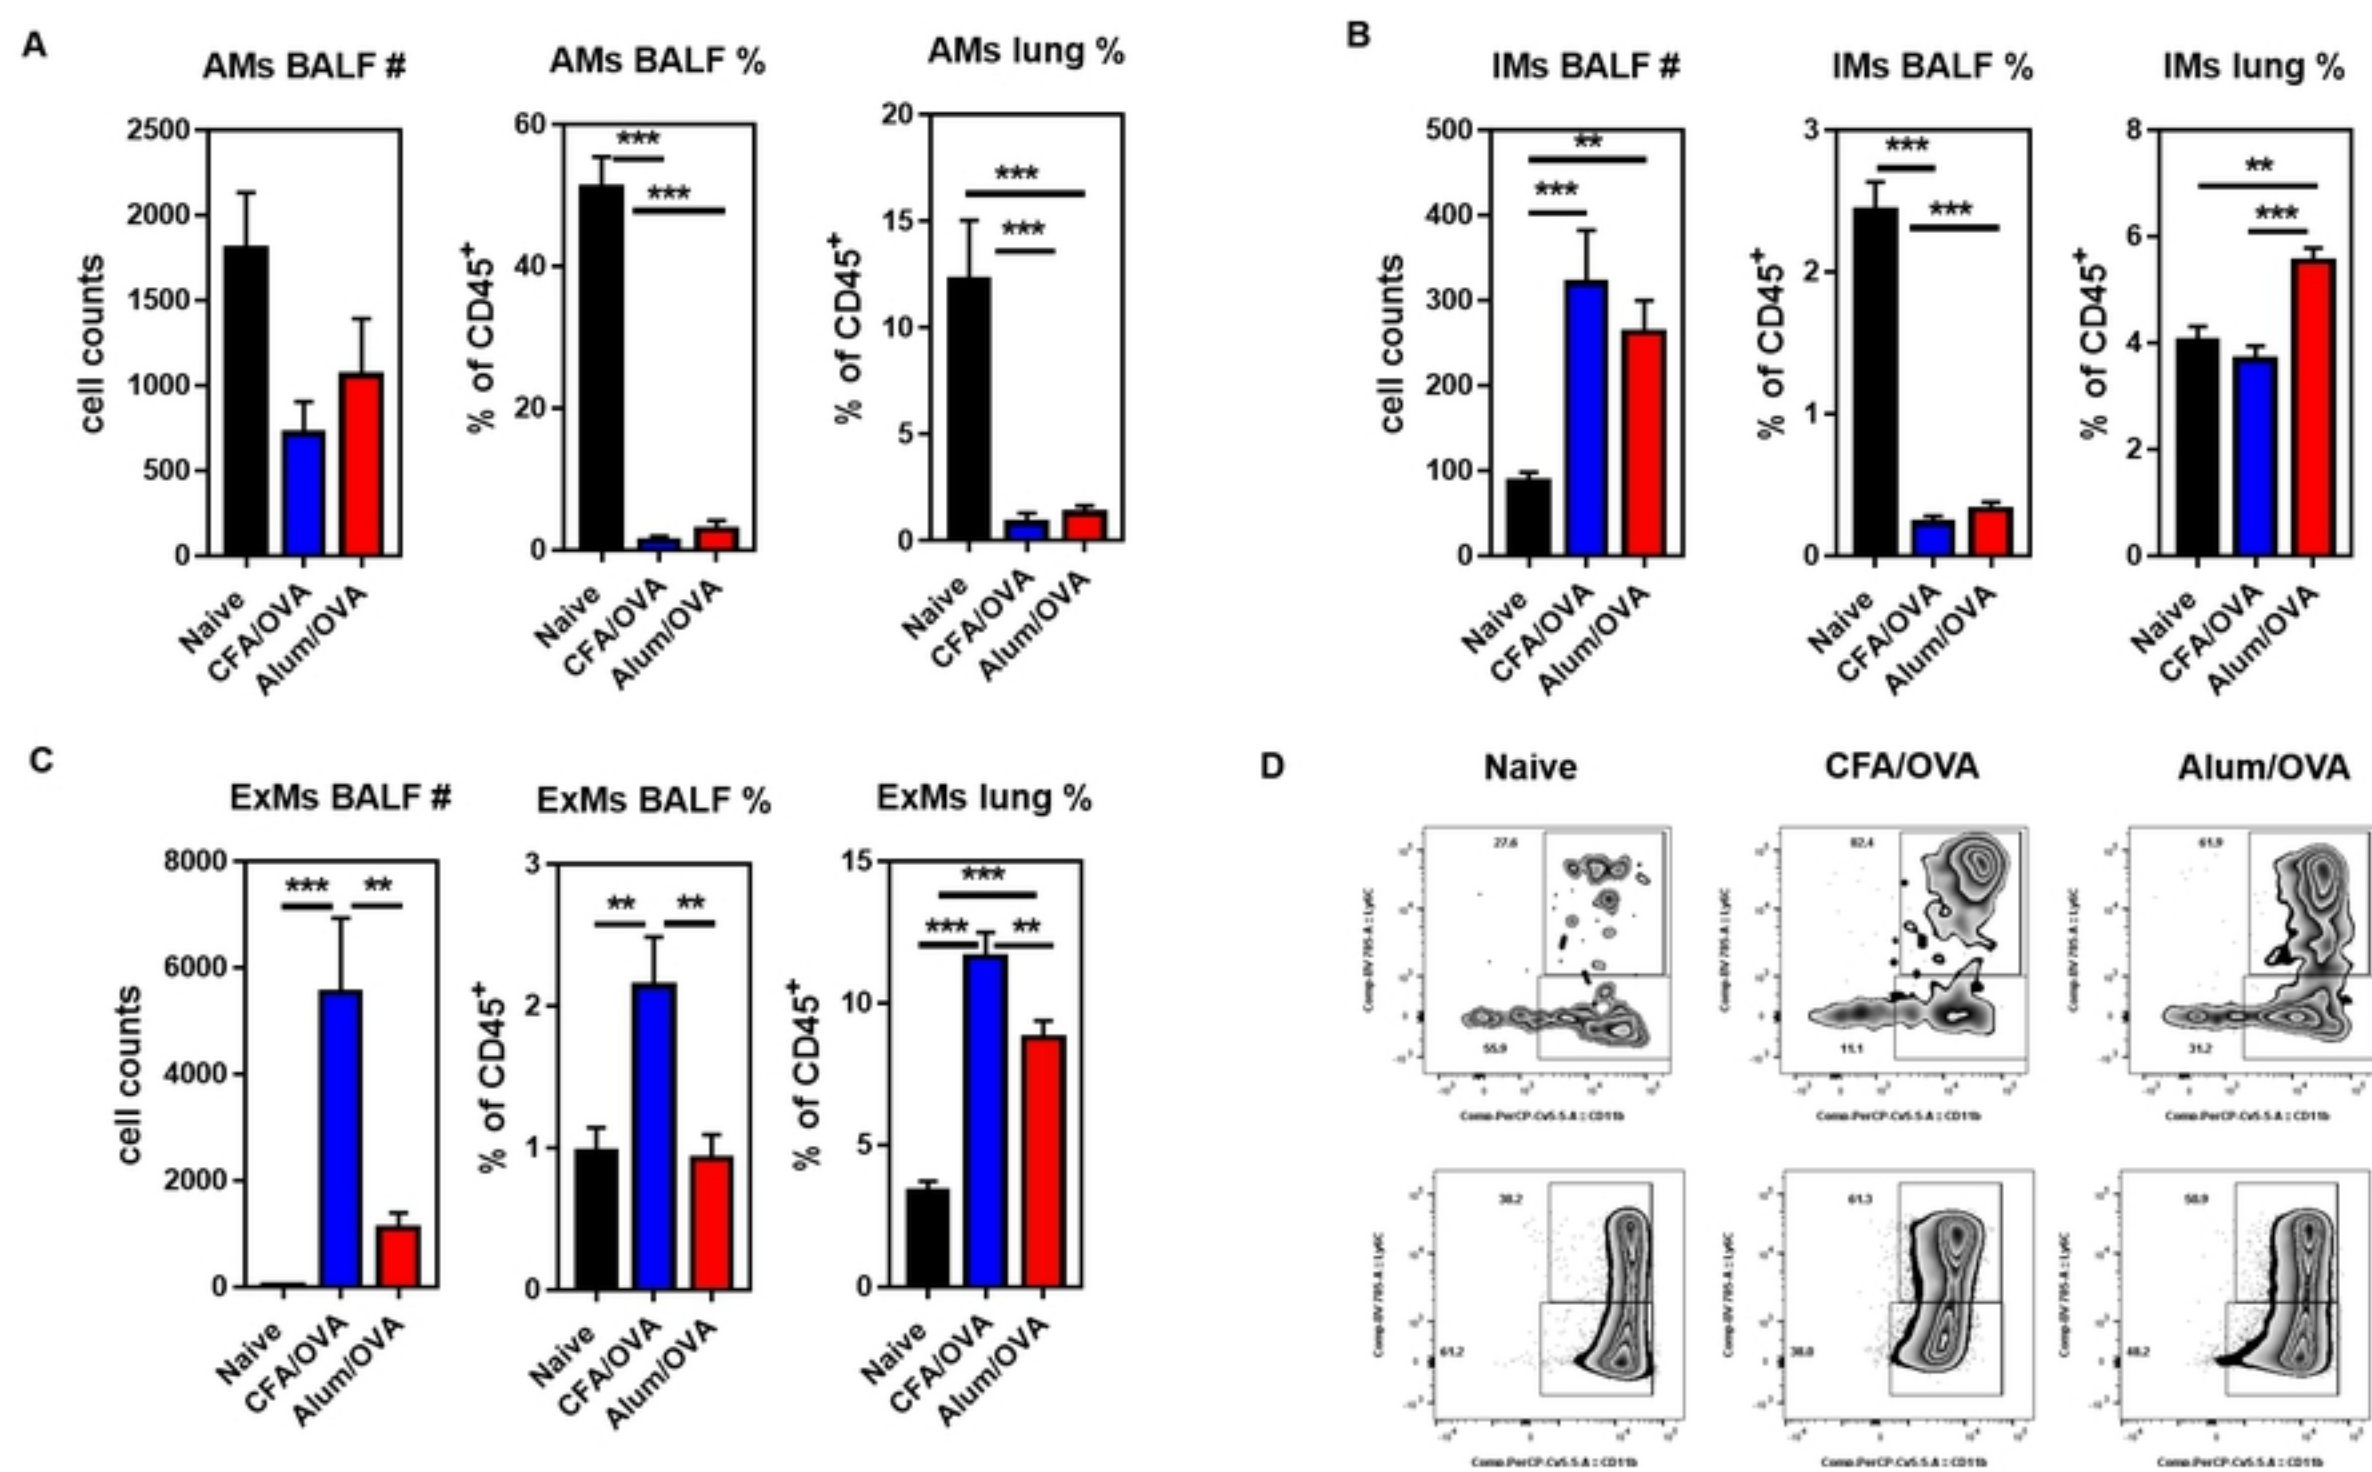

Fig 3 A-D

E

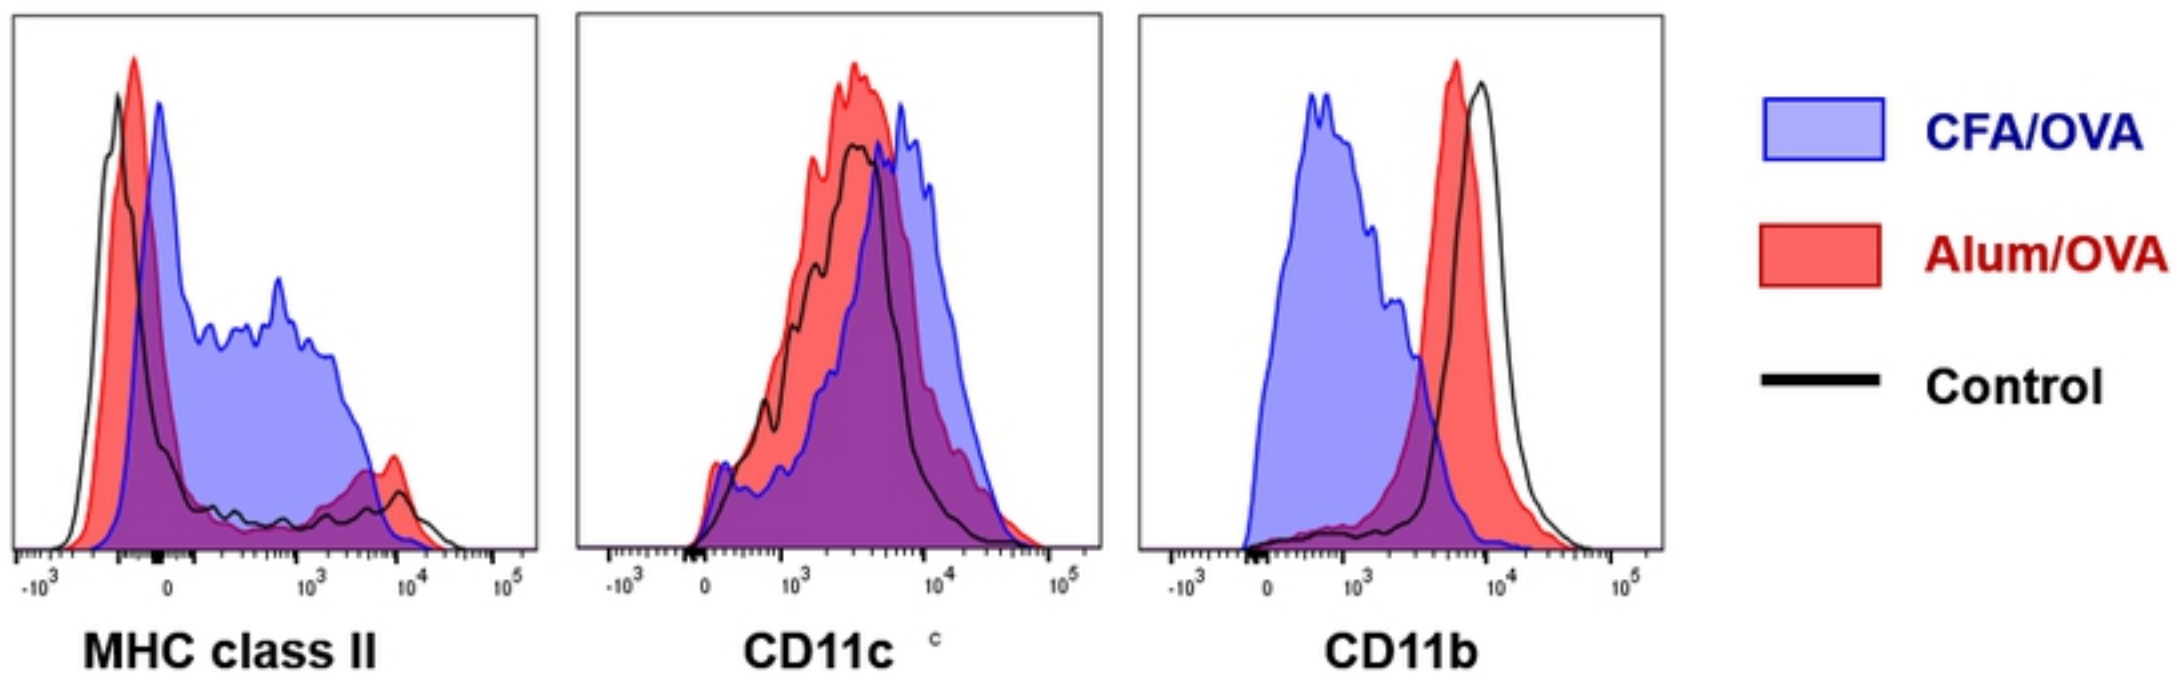

F

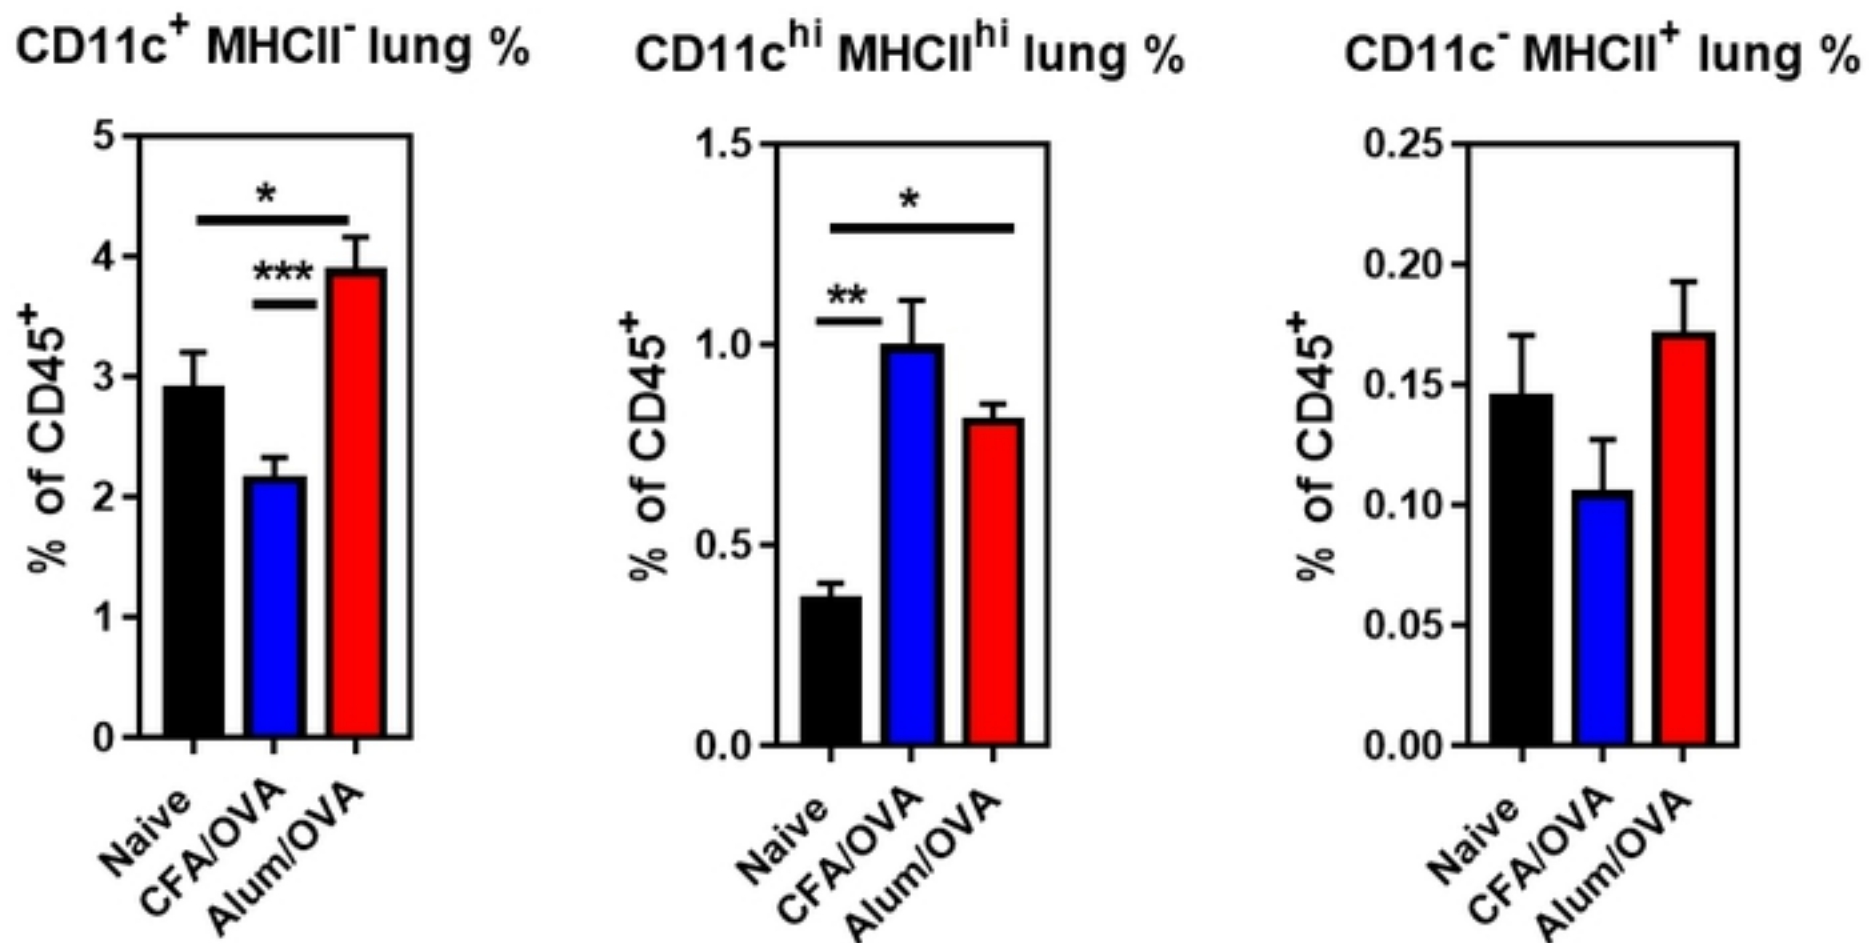

Fig 3 E-F



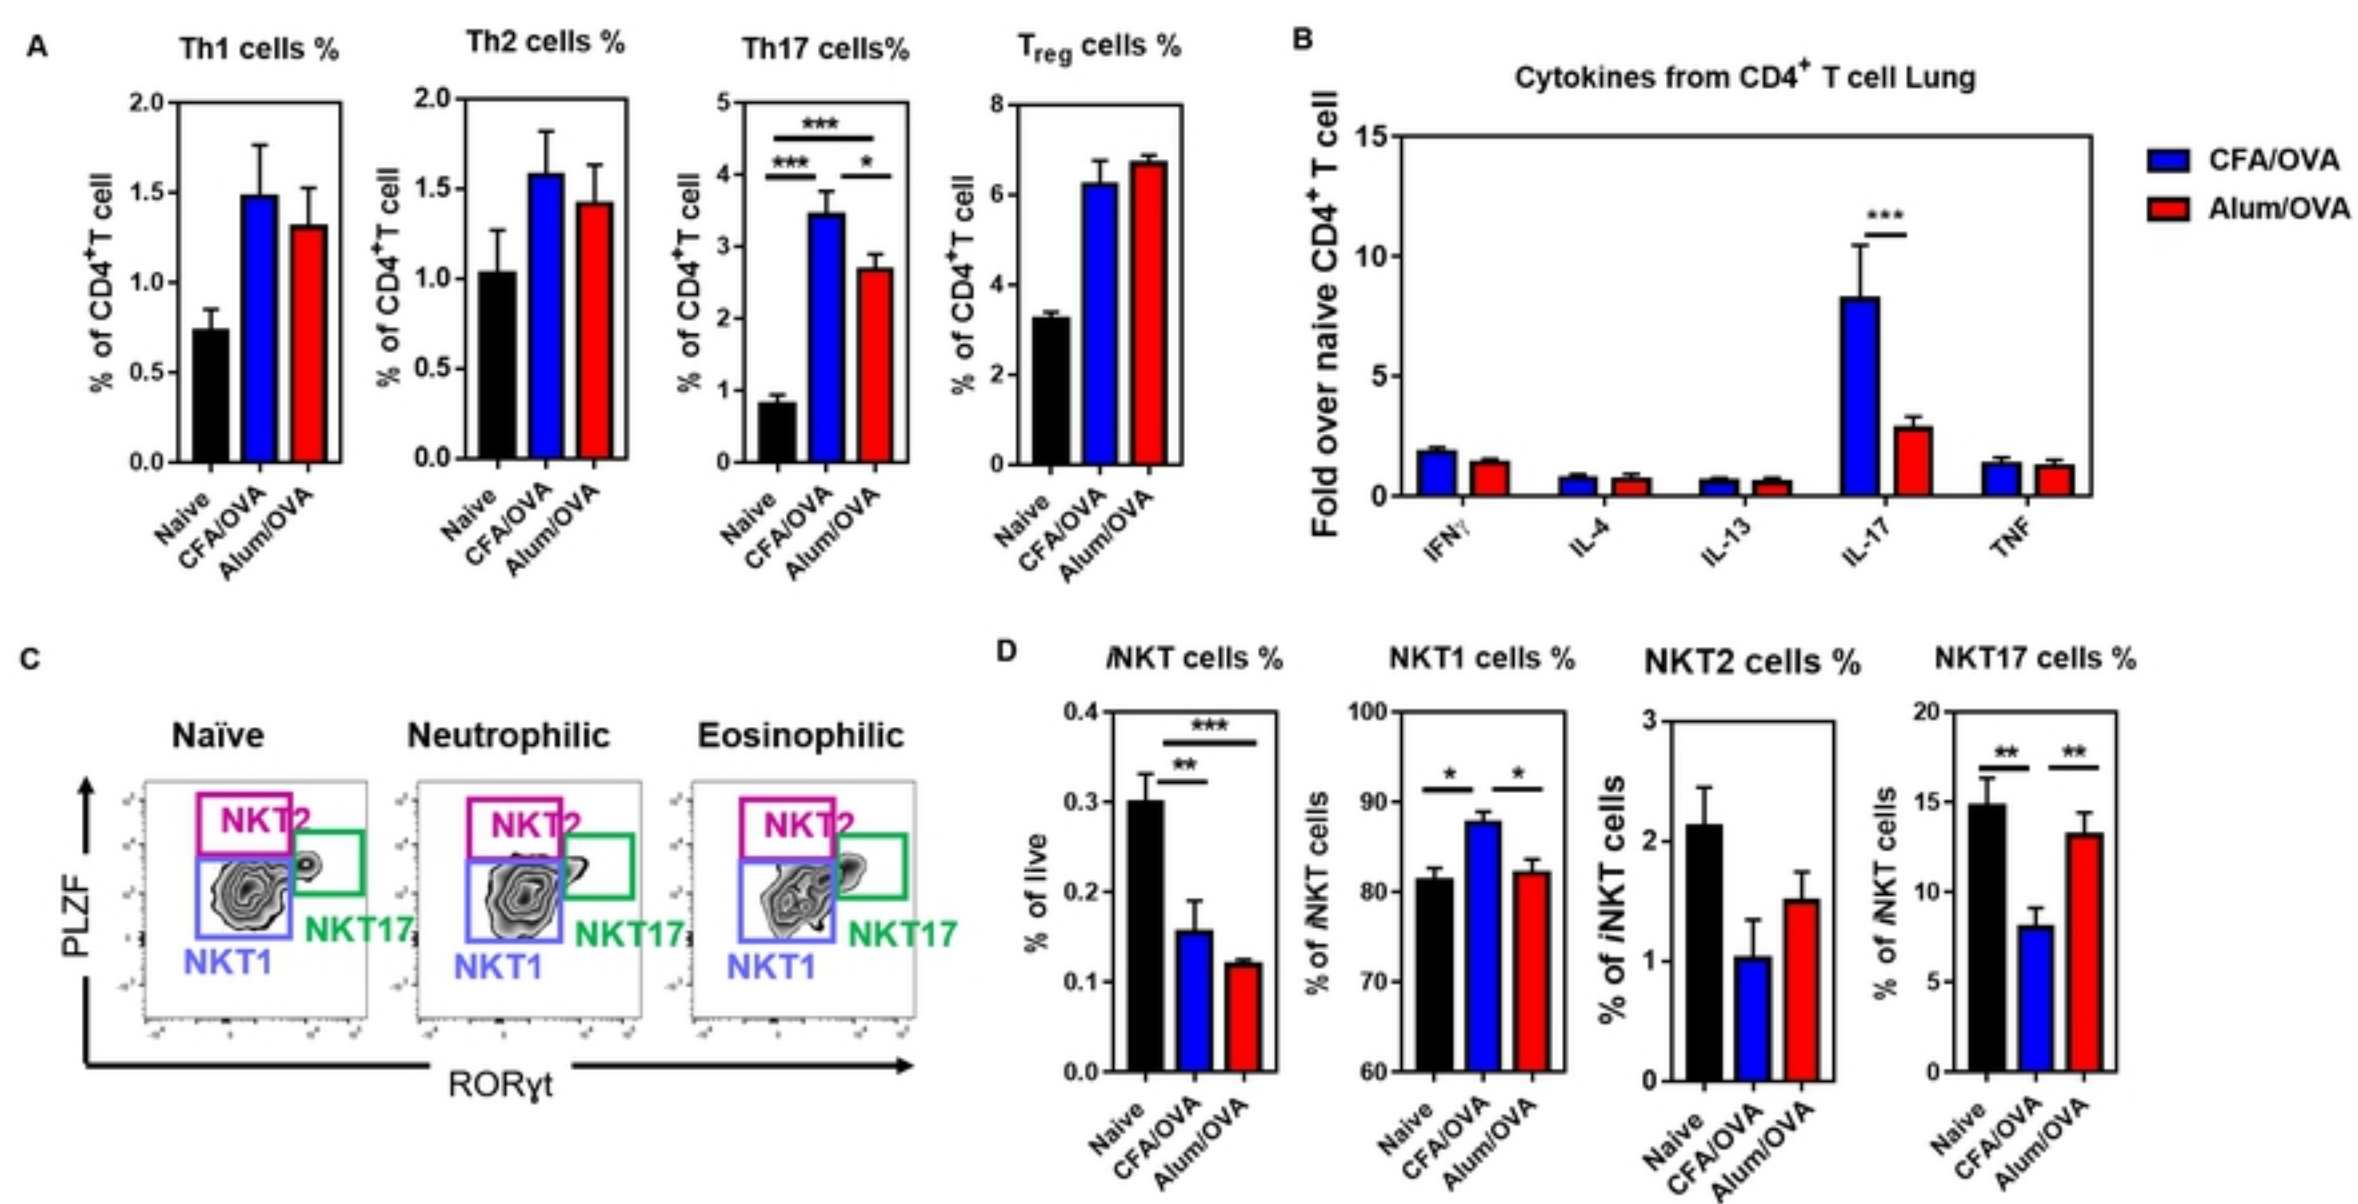

Fig 4

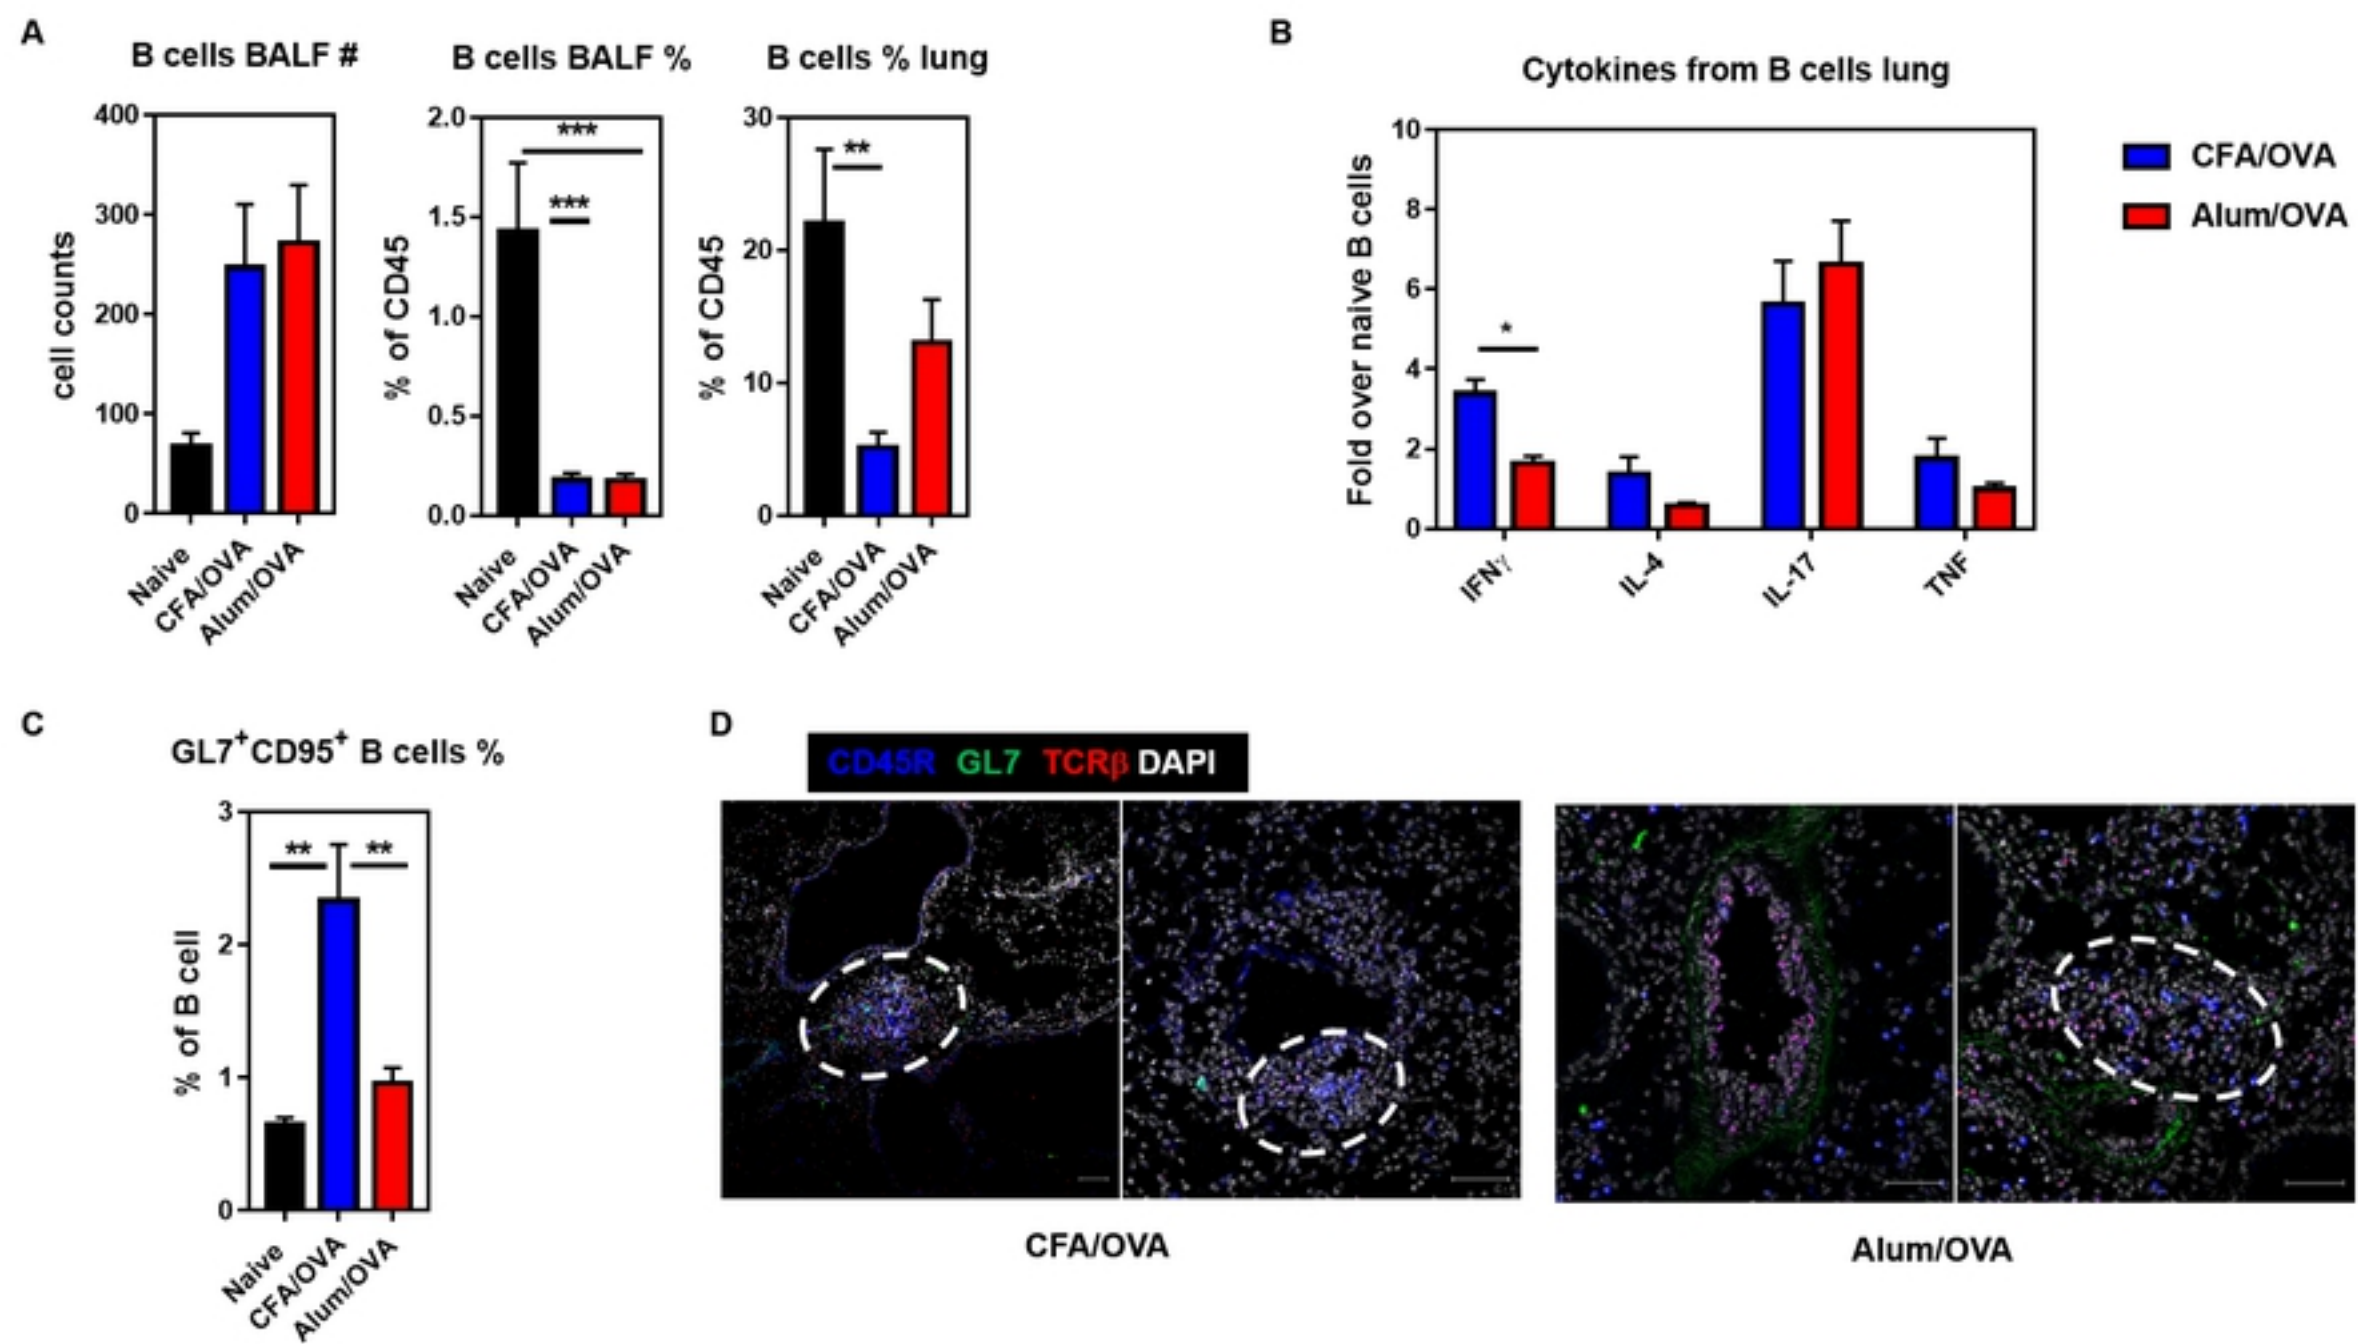

Fig 5

A

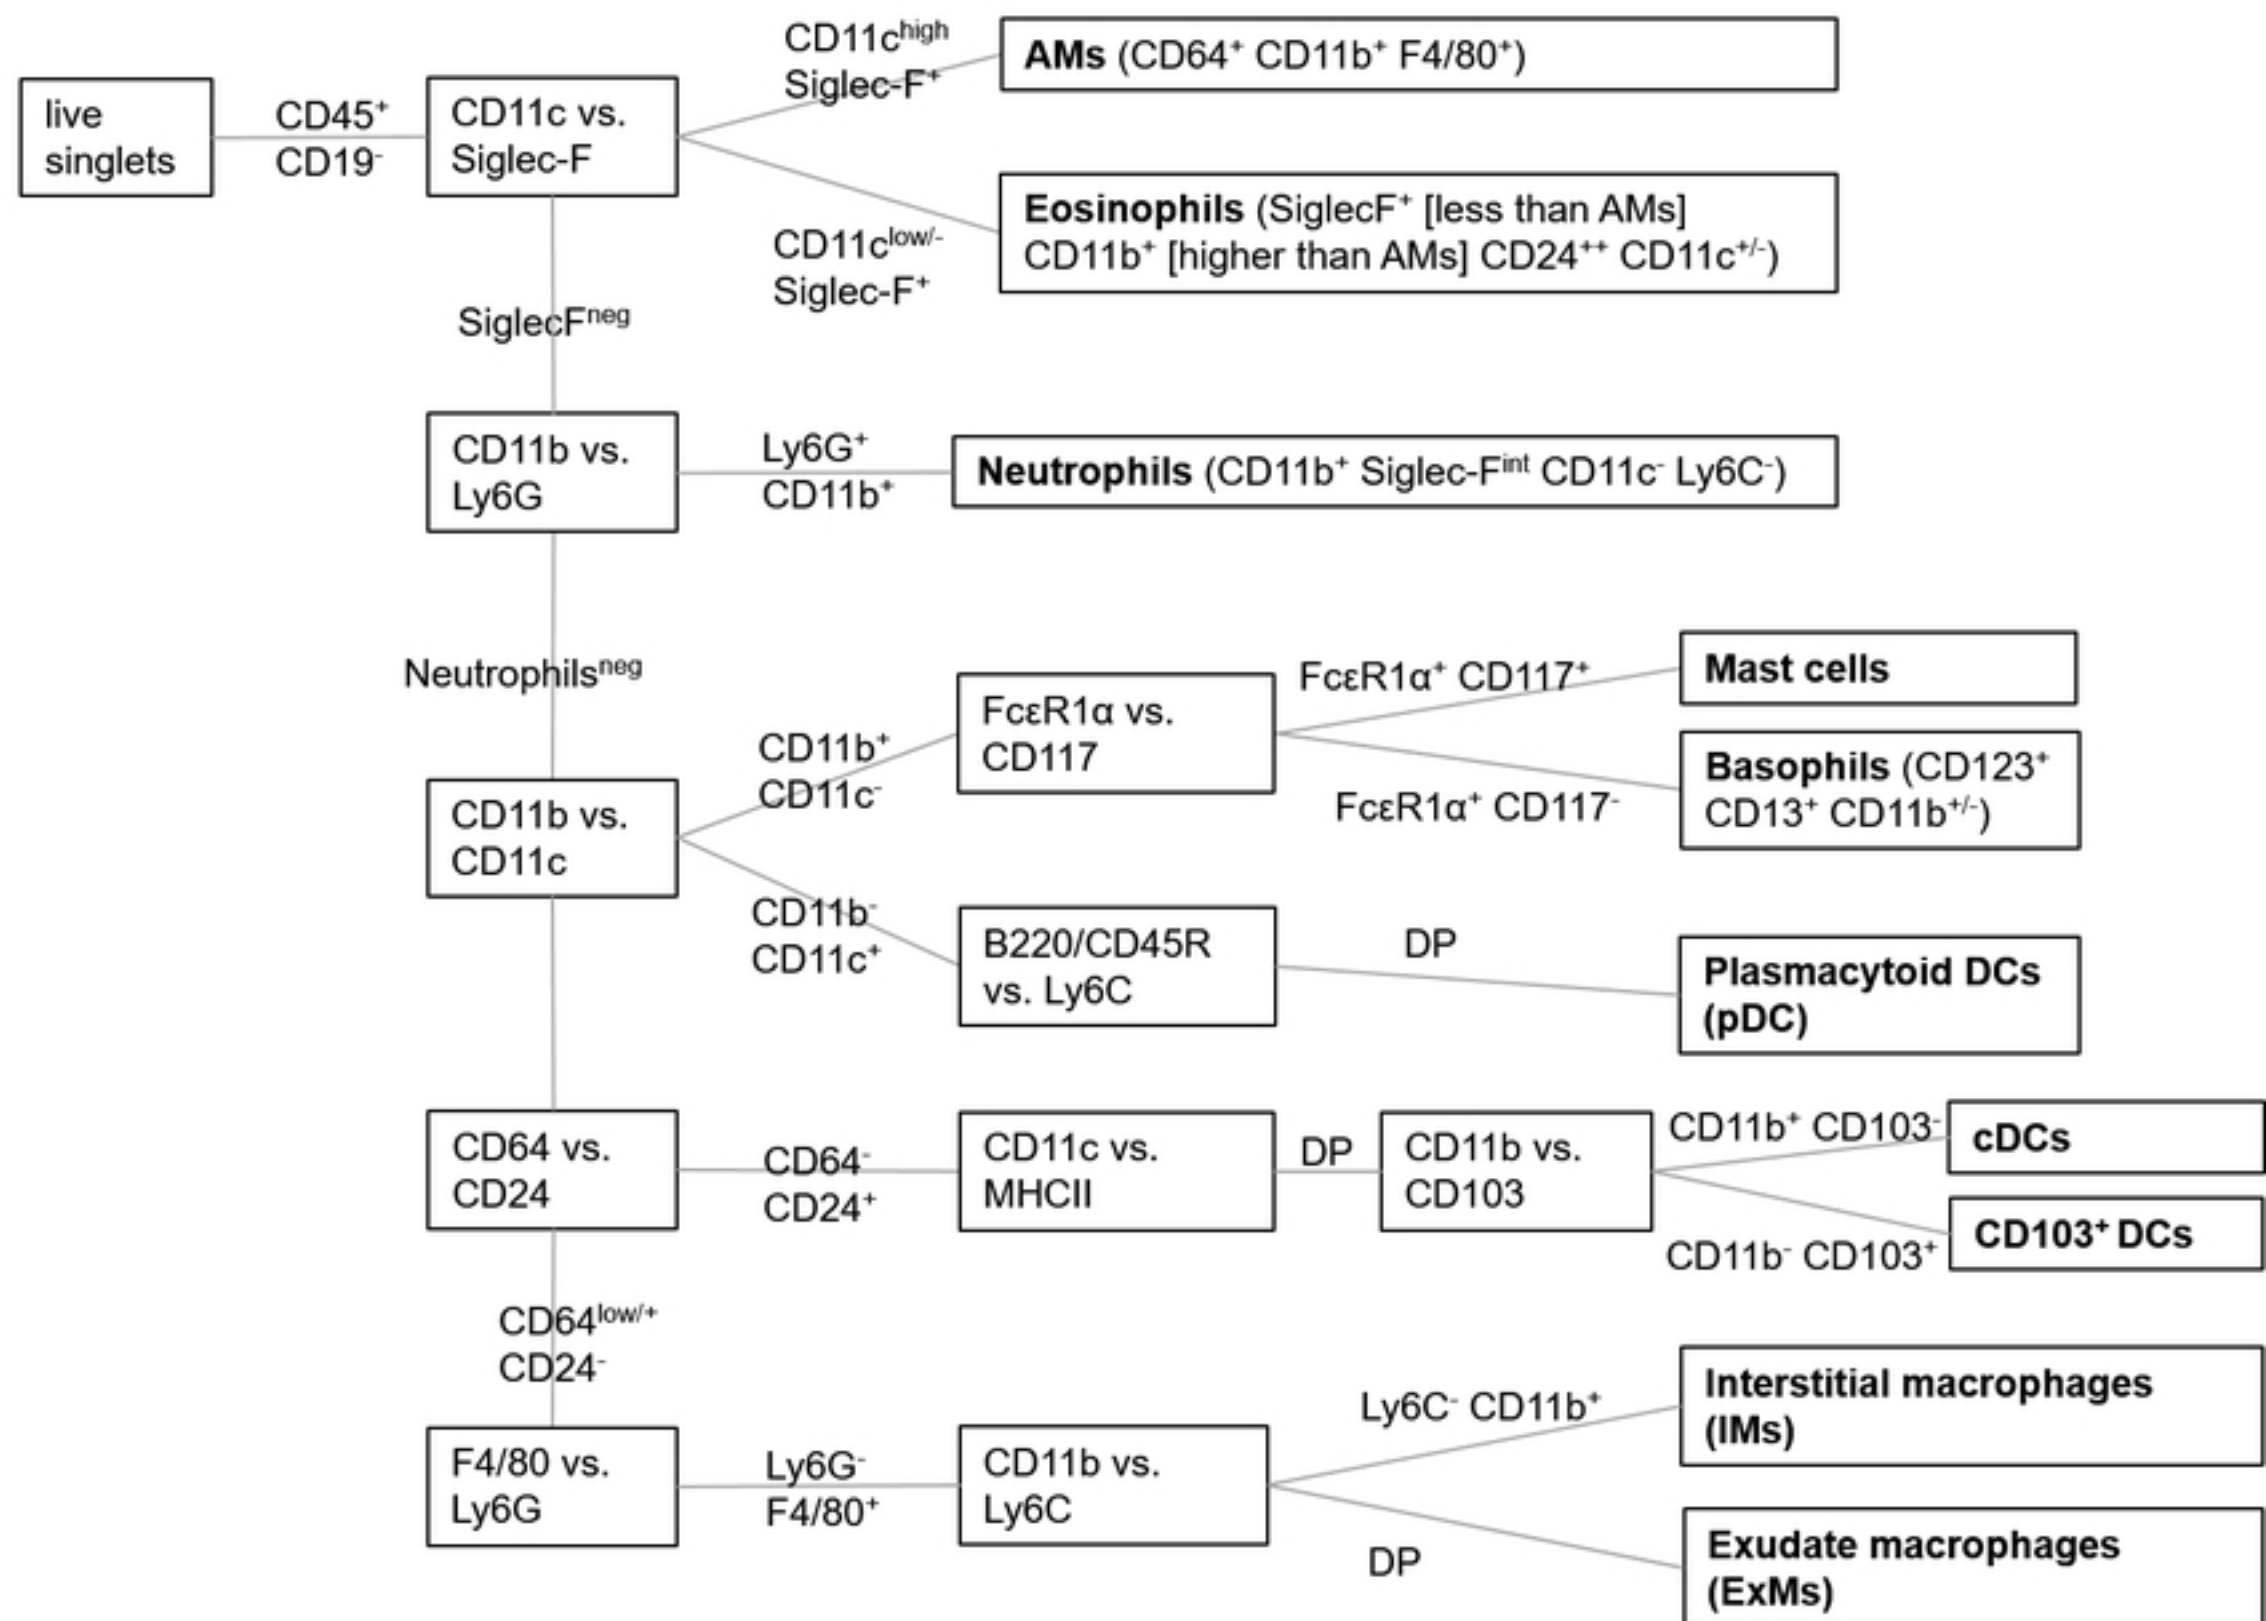

S1 Fig A



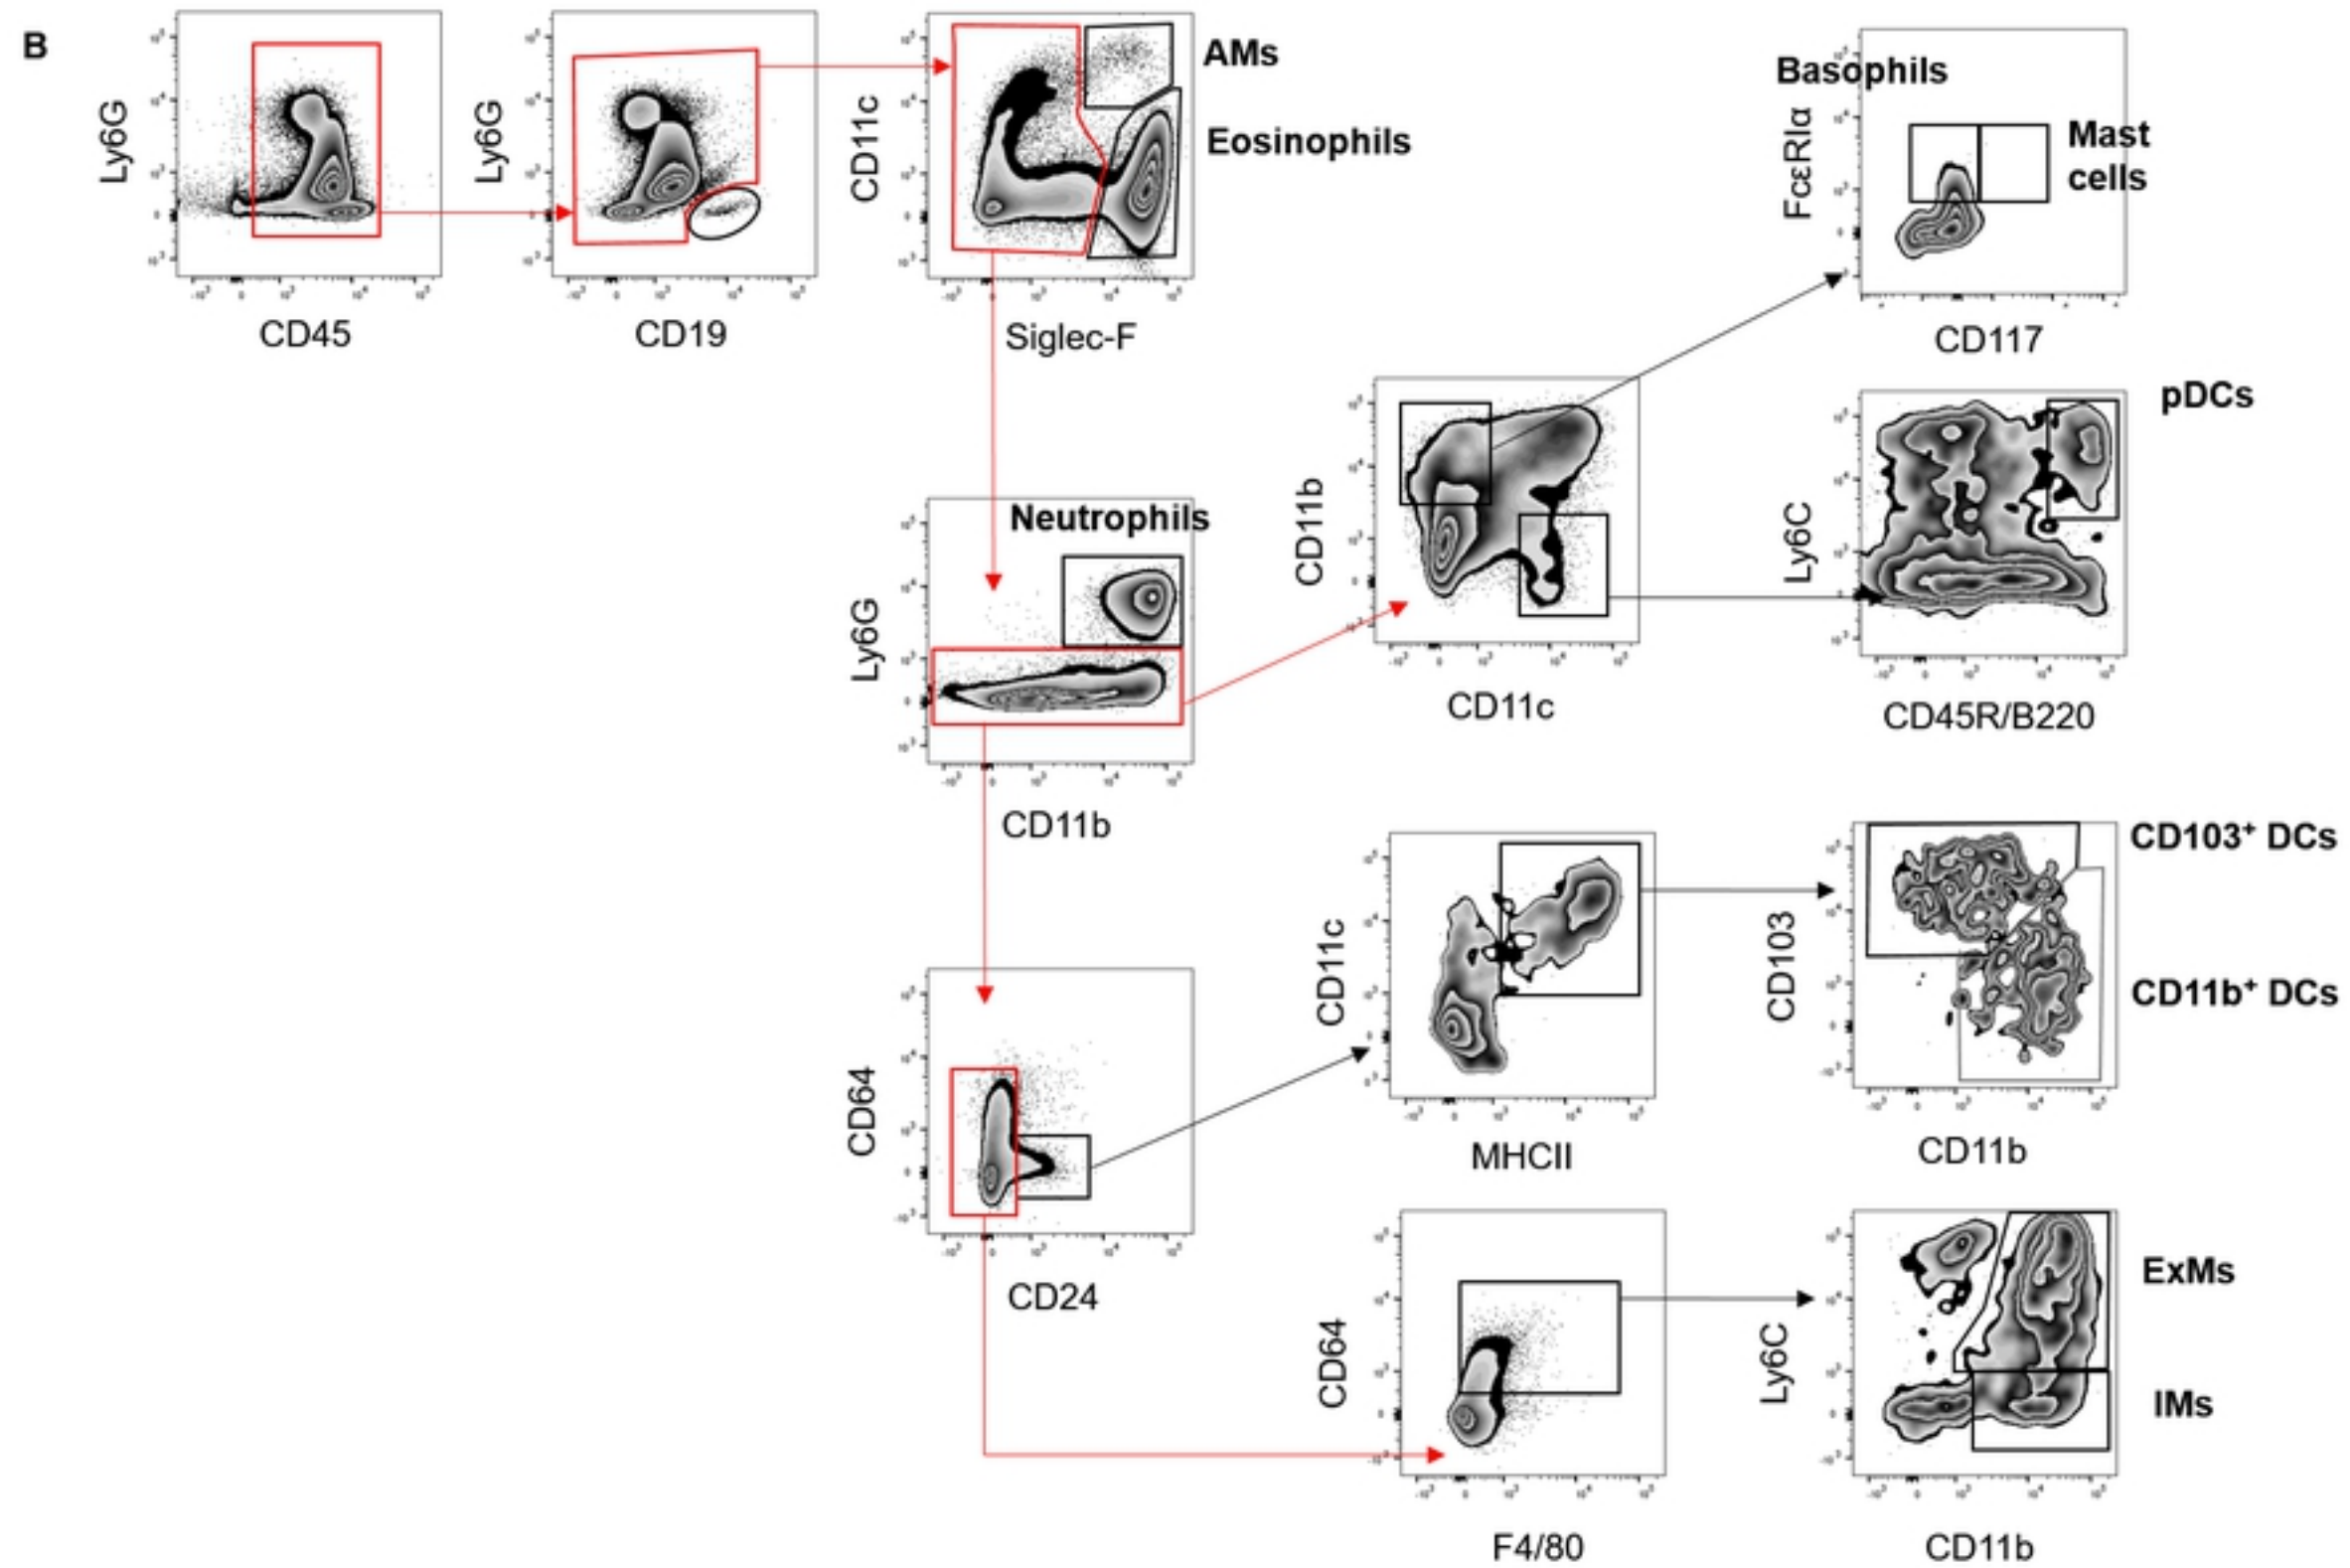

S1 Fig B

A

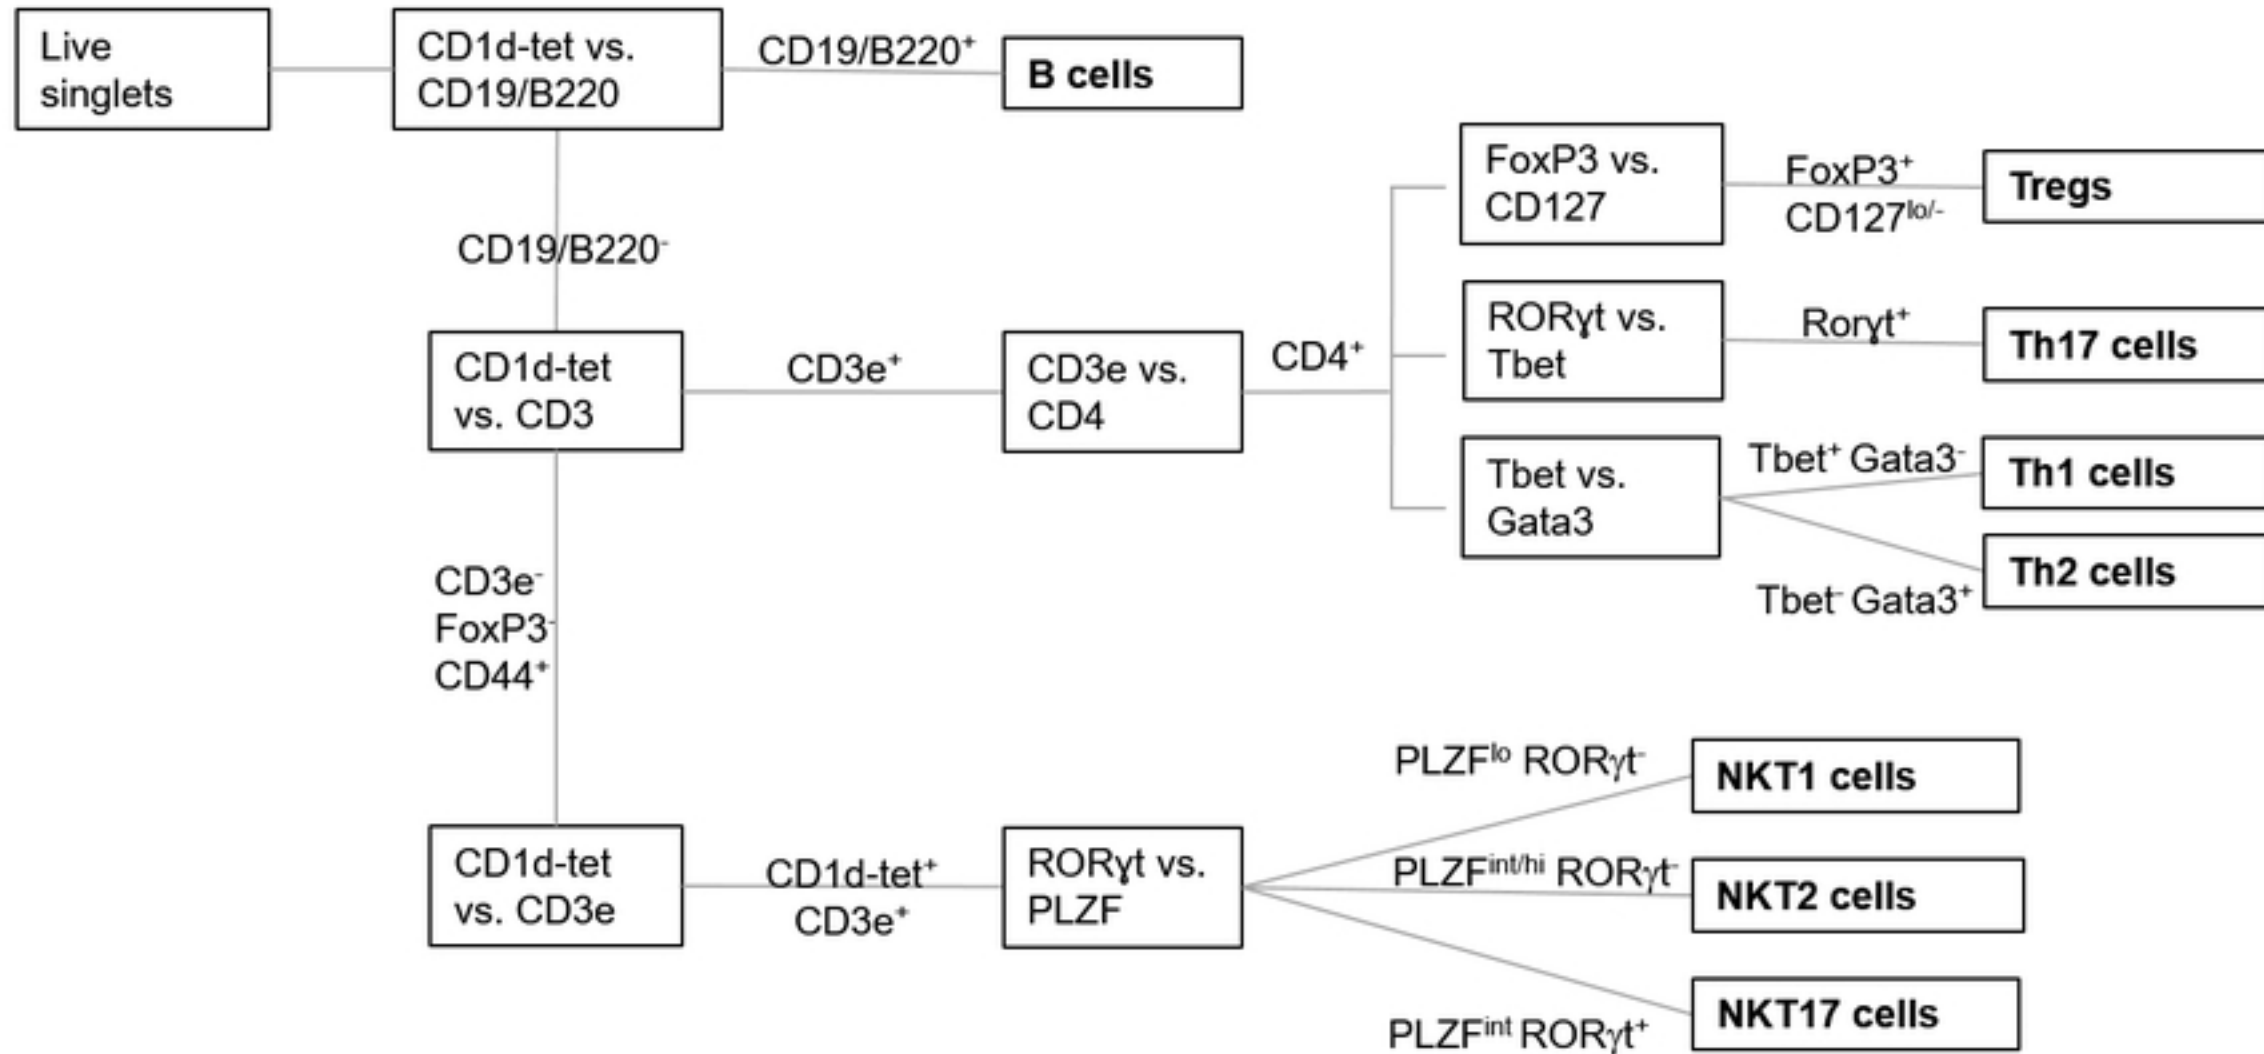

S2 Fig A

**B**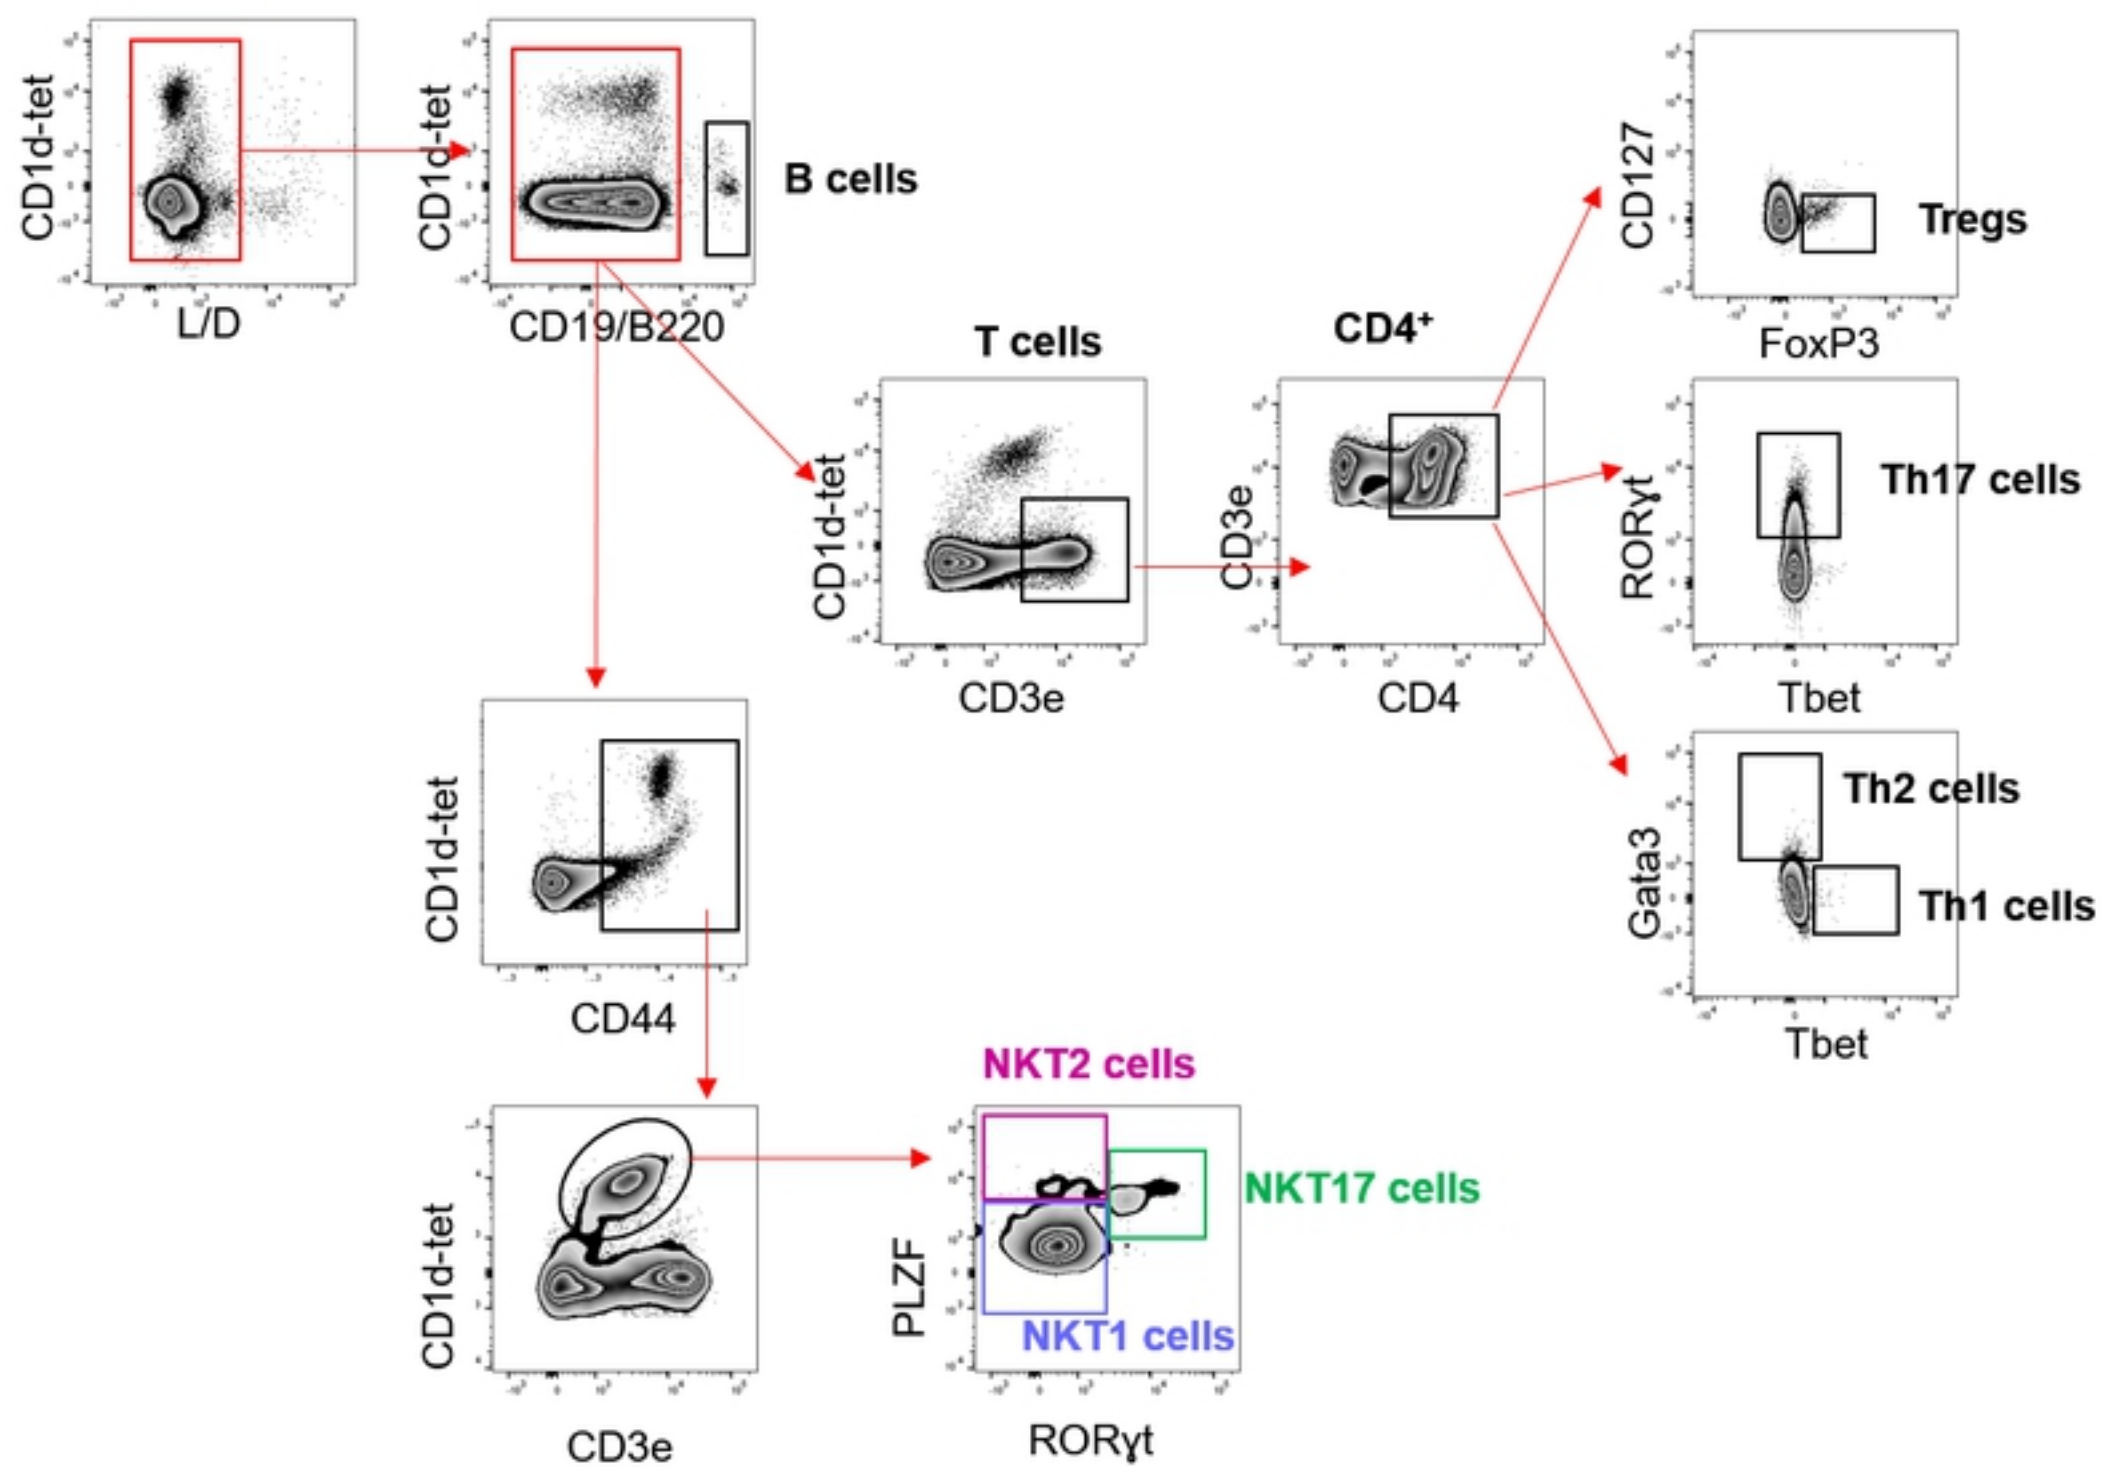

S2 Fig B

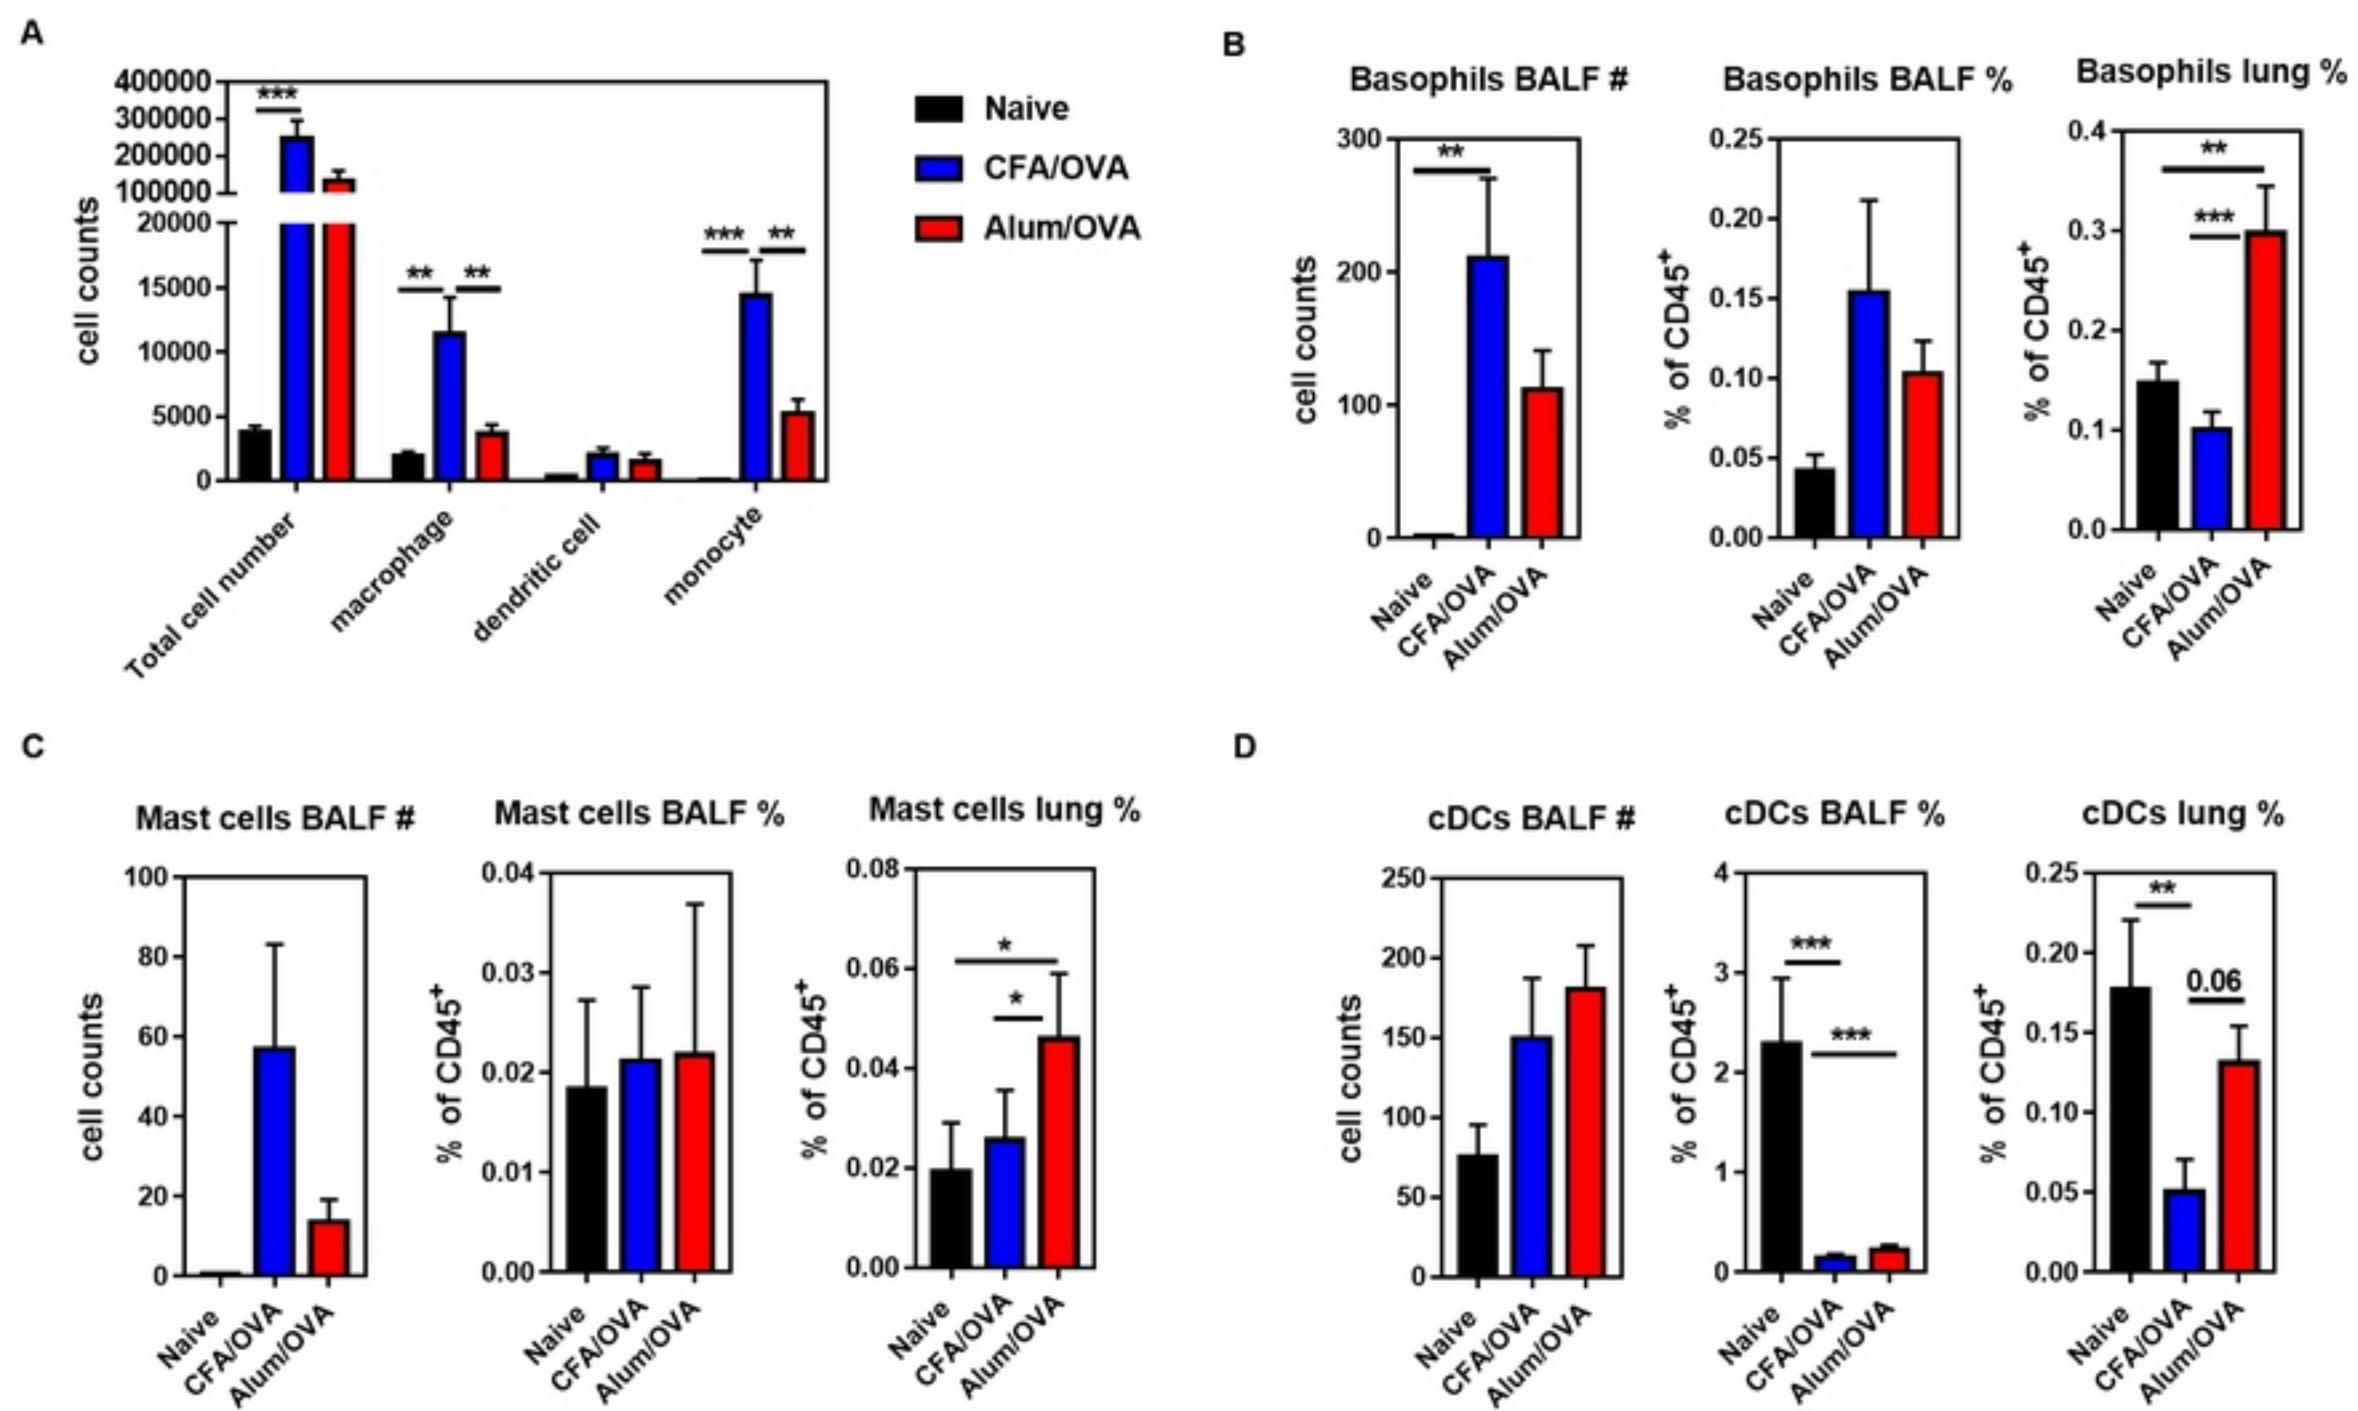

Fig 2 A-D
